1                   **The ERK MAPK pathway modulates Gq-dependent locomotion in**  
2                                           ***Caenorhabditis elegans***

3  
4

5                   Brantley Coleman, Irini Topalidou, and Michael Ailion

6  
7  
8  
9  
10  
11

12                   Department of Biochemistry, University of Washington, Seattle, WA, 98195

13

14 Running Title: The ERK pathway modulates Gq signaling

15

16 Keywords: Gq signaling, ERK MAPK pathway, Rho small GTPase, *C. elegans*, G

17 protein

18

19 Corresponding author:

20 Michael Ailion

21 Department of Biochemistry

22 University of Washington

23 Box 357350

24 1705 NE Pacific St

25 Seattle, WA 98195

26 Phone: 206-685-0111

27 email: [mailion@uw.edu](mailto:mailion@uw.edu)

28

29 **Abstract**

30

31       The heterotrimeric G protein Gq regulates neuronal activity through distinct  
32 downstream effector pathways. In addition to the canonical Gq effector phospholipase  
33 C $\beta$ , the small GTPase Rho was recently identified as a conserved effector of Gq. To  
34 identify additional molecules important for Gq signaling in neurons, we performed a  
35 forward genetic screen in the nematode *Caenorhabditis elegans* for suppressors of the  
36 hyperactivity and exaggerated waveform of an activated Gq mutant. We isolated two  
37 mutations affecting the MAP kinase scaffold protein KSR-1 and found that KSR-1  
38 modulates locomotion downstream of or in parallel to the Gq-Rho pathway. Through  
39 epistasis experiments, we found that the core ERK MAPK cascade is required for Gq-  
40 Rho regulation of locomotion, but that the canonical ERK activator LET-60/Ras may not  
41 be required. Through neuron-specific rescue experiments, we found that the ERK  
42 pathway functions in acetylcholine neurons to control Gq-dependent locomotion.  
43 Additionally, expression of activated LIN-45/Raf in acetylcholine neurons is sufficient to  
44 cause an exaggerated waveform phenotype and hypersensitivity to the  
45 acetylcholinesterase inhibitor aldicarb, similar to an activated Gq mutant. Taken  
46 together, our results suggest that the ERK MAPK pathway modulates the output of Gq-  
47 Rho signaling to control locomotion behavior in *C. elegans*.

48

## 49 **Introduction**

50           The heterotrimeric G protein Gq is a conserved regulator of neurotransmission in  
51 metazoans. Gq is highly expressed in neurons in mammals and in the nematode *C.*  
52 *elegans* (Wilkie *et al.* 1991; Lackner *et al.* 1999). In its canonical signaling pathway, Gq  
53 activates phospholipase C $\beta$  (PLC $\beta$ ) to cleave the membrane lipid phosphatidylinositol  
54 4,5-bisphosphate (PIP<sub>2</sub>) into inositol trisphosphate (IP<sub>3</sub>) and diacylglycerol (DAG)  
55 (Rhee 2001). An increased DAG concentration at the synapse helps trigger synaptic  
56 vesicle release (Miller *et al.* 1999; Lackner *et al.* 1999).

57           In addition to activating PLC $\beta$ , Gq directly binds and activates the Rho guanine  
58 nucleotide exchange factor (GEF) Trio, which in turn activates the small GTPase Rho  
59 (Lutz *et al.* 2005, 2007; Williams *et al.* 2007). In mature *C. elegans* neurons, the Rho  
60 ortholog RHO-1 regulates synaptic activity through multiple G protein-dependent  
61 mechanisms. First, RHO-1 acts downstream of the G<sub>12</sub>-class G protein GPA-12 by  
62 binding to and inhibiting the diacylglycerol kinase DGK-1. Inhibition of DGK-1 allows  
63 DAG to accumulate at the synapse, thereby increasing synaptic vesicle release  
64 (McMullan *et al.* 2006; Hiley *et al.* 2006). Second, Gq-Rho signaling promotes  
65 neurotransmitter release by recruiting the sphingosine kinase SPHK-1 to presynaptic  
66 terminals (Chan *et al.* 2012). Third, Gq-Rho signaling positively regulates the NCA-  
67 1/NALCN cation channel to regulate locomotion (Topalidou *et al.* 2017a). Here we  
68 identify the extracellular signal-related kinase mitogen-activated protein kinase (ERK  
69 MAPK) pathway as a positive regulator of neuronal activity acting downstream of or in  
70 parallel to Gq and Rho in acetylcholine neurons.

71 ERK MAPK signaling acts extensively in animal development, cellular  
72 proliferation, and cancer signaling (Yoon and Seger 2006; Karnoub and Weinberg 2008;  
73 Sun *et al.* 2015). ERKs are highly expressed in mammalian neurons (Boulton *et al.*  
74 1991; Ortiz *et al.* 1995) and act in both the nucleus and at the synapse to regulate  
75 synaptic activity and plasticity (Thomas and Huganir 2004; Sweatt 2004; Mao and Wang  
76 2016b). In *C. elegans*, the ERK pathway is required for multiple developmental events  
77 including specification of the vulva (Sternberg 2005; Sundaram 2013), and also acts in  
78 several types of neurons to control behavior. ERK signaling is activated in response to  
79 odorants in the AWC sensory neuron to regulate chemotaxis to volatile odorants and in  
80 AIY interneurons to mediate odor adaptation (Hirotsu *et al.* 2000; Hirotsu and Iino 2005;  
81 Chen *et al.* 2011; Uozumi *et al.* 2012). ERK is also activated in the ASER sensory  
82 neuron to regulate chemotaxis to salt (Tomioka *et al.* 2006; Tomida *et al.* 2012). ERK  
83 signaling regulates foraging behavior by acting in the IL1, OLQ, and RMD neurons  
84 (Hamakawa *et al.* 2015). Finally, the ERK pathway has been shown to act in  
85 interneurons to regulate the nose touch response, a mechanosensory behavior (Hyde *et*  
86 *al.* 2011).

87 In the canonical ERK MAPK pathway, extracellular ligand binding activates  
88 transmembrane receptor tyrosine kinases (RTKs), and adaptor proteins recruit a GEF to  
89 activate the small GTPase Ras (LET-60 in *C. elegans*). Upon Ras activation, LIN-45/Raf  
90 translocates to the plasma membrane where it interacts with Ras and the scaffold  
91 protein KSR-1. KSR-1 facilitates the activation of LIN-45/Raf and the subsequent  
92 phosphorylation of the MAPK cascade consisting of LIN-45/Raf, MEK-2/MEK, and MPK-  
93 1/ERK (Sundaram 2013). In this study, we found that the ERK MAPK pathway

94 consisting of KSR-1, LIN-45/Raf, MEK-2/MEK and MPK-1/ERK modulates Gq-Rho  
95 signaling in acetylcholine neurons, but that surprisingly LET-60/Ras may not be  
96 required.  
97

## 98 **Materials and Methods**

99

### 100 ***C. elegans* strains**

101 All strains were cultured using standard methods and were maintained at 20°C.

102 Table S1 contains all the strains used in this study.

103

### 104 ***Isolation and mapping of the ksr-1(ox314) and ksr-1(yak10) mutations***

105 The *ox314* and *yak10* mutants were isolated from an ENU mutagenesis  
106 suppressor screen of the activated Gq mutant *egl-30(tg26)* (Ailion *et al.* 2014). We  
107 mapped the *ox314* mutation by its activated Gq suppression phenotype using single  
108 nucleotide polymorphisms (SNPs) in the Hawaiian strain CB4856 as described (Davis *et*  
109 *al.* 2005). The *ox314* mutation was mapped to an approximately 709 kb region in the  
110 middle of the X chromosome between SNPs on cosmids F45E1 and F53A9 (SNPs  
111 F45E1[1] and pkP6158). This region included 159 predicted protein-coding genes. A  
112 complementation test of *ox314* and *yak10* in the *egl-30(tg26)* background showed these  
113 to be alleles of the same gene. Whole genome sequencing (see below) identified these  
114 as mutations in *ksr-1*, and we confirmed this by performing a complementation test with  
115 the deletion allele *ksr-1(ok786)*.

116

### 117 ***Whole genome sequencing***

118 Strains EG4198 *egl-30(tg26); ox314* and XZ1340 *egl-30(tg26); yak10* were  
119 sequenced to identify candidate mutations. DNA was purified according to the Hobert  
120 Lab protocol (<http://hobertlab.org/whole-genome-sequencing/>). Ion Torrent sequencing

121 was performed at the University of Utah DNA Sequencing Core Facility. Each data set  
122 contained roughly 18,400,000 reads of a mean read length of 160 bases, resulting in  
123 about 30X average coverage of the *C. elegans* genome. The sequencing data were  
124 processed on the Galaxy server at usegalaxy.org (Afgan *et al.* 2016). SNPs and indels  
125 were identified and annotated using the Unified Genotyper and SnpEff tools (DePristo *et*  
126 *al.* 2011; Cingolani *et al.* 2012). After filtering for mutations in open reading frames, we  
127 found each strain to have unique stop mutations in *ksr-1*, in the middle of the interval  
128 where we mapped *ox314*. *ox314* is a G to A transition that causes a stop codon at  
129 amino acid K463, and *yak10* is an A to T transversion that causes a stop codon at  
130 W254.

131

### 132 ***Locomotion assays***

133 Track waveform and radial locomotion assays were performed on 10 cm  
134 nematode growth medium (NGM) plates seeded with 400  $\mu$ l of OP50 *E. coli* culture and  
135 spread with sterile glass beads. Bacterial lawns were grown at 37°C for 16 hrs and the  
136 plates were stored at 4°C until needed. For track waveform measurements, five first day  
137 adult animals were placed on a plate and allowed to roam for 2-5 min. We then  
138 recorded each animal's tracks following forward locomotion. Track pictures were taken  
139 at 40X on a Nikon SMZ18 microscope with the DS-L3 camera control system. Pictures  
140 of worm tracks were processed using ImageJ. Period and 2X amplitude were measured  
141 freehand using the line tool. For each worm, we calculated the average  
142 period/amplitude ratio of five individual track bends (Figure 1C). For assays with the  
143 temperature sensitive allele *sos-1(cs41)*, all strains were grown at 20°C and shifted to



144 the non-permissive temperature of 25°C for 24 hours before being assayed. For radial  
145 locomotion assays, ten to fifteen first day adult animals were picked to the center of a  
146 plate and were then allowed to move freely for 40 minutes. The positions of worms were  
147 marked and the distances of the worms from the starting point were measured. For all  
148 waveform and radial locomotion assays, the experimenter was blind to the genotypes of  
149 the strains assayed.

150

### 151 **Microscopy**

152 Photographs of moving worms were taken at 60X on a Nikon SMZ18 microscope  
153 with the DS-L3 camera control system. The worms were age-matched as first day  
154 adults grown at 20°C.

155

### 156 **Constructs and transgenes**

157 Plasmids were constructed using the three-slot multisite Gateway cloning system  
158 (Invitrogen). Plasmids and primers used are found in Tables S2 and S3. The *ksr-1* and  
159 *lin-45* cDNAs were amplified by PCR from worm cDNA library and cloned into [1-2]  
160 Gateway entry vectors. Activating Raf mutations T626E/T629D were introduced into the  
161 *lin-45* cDNA vector by two sequential site-directed mutagenesis reactions (Q5 kit, NEB)  
162 with primers oBC094/095 and oBC096/097, respectively, and then confirmed by  
163 sequencing. The *ksr-1* and activated *lin-45* cDNAs were cloned into expression  
164 constructs under different neuronal promoters using the multisite Gateway system.  
165 Proper expression of *ksr-1* and activated *lin-45* was confirmed by including an operon  
166 GFP::H2B in the [2-3] slot of the expression constructs. The operon GFP template *tbb-2*

167 *3'utr::gpd-2 operon::GFP::H2B:cye-1 3'utr* (Frøkjær-Jensen *et al.* 2012) results in  
168 untagged proteins whose expression can be monitored by GFP expression.

169

### 170 ***Injections and chromosomal integrations***

171 Worms carrying the activated *lin-45* transgenes *Punc-17::lin-45\** and *Punc-*  
172 *17H::lin-45\** as extrachromosomal arrays were generated by injecting pBC37 or pBC44  
173 at 20 ng/μL or 10 ng/ μL respectively along with co-injection markers pCFJ104 (*Pmyo-*  
174 *3::mCherry*) at 5 ng/μL, pCFJ90 (*Pmyo-2::mCherry*) at 2.5 ng/μL, and the carrier DNA  
175 Litmus 38i to a final concentration of 100 ng/μL DNA (Mello *et al.* 1991). MosSCI lines  
176 were generated as described (Frøkjær-Jensen *et al.* 2012) using an injection mix  
177 containing 10-15 ng/μL targeting vector, 50 ng/μL pCFJ601 (*Peft-3::Mos1* transposase),  
178 negative selection markers pGH8 (*Prab-3::mCherry*) at 10 ng/μL, pCFJ104 (*Pmyo-*  
179 *3::mCherry*) at 5 ng/μL, pCFJ90 (*Pmyo-2::mCherry*) at 2.5 ng/μL, pMA122  
180 (*Phsp16.41::peel-1*) at 10 ng/μL, and carrier DNA Litmus 38i to a final concentration of  
181 100 ng/μL DNA.

182 Extrachromosomal arrays were integrated into the genome by exposure to 4000  
183 rads of gamma irradiation. Irradiated young adult hermaphrodites were transferred to 10  
184 cm OP50 plates (5 worms/plate) and grown to starvation. The plates were chunked and  
185 grown to starvation twice more to enrich for stably expressing lines. When nearly  
186 starved, 8 animals per plate were picked to individual plates. The progeny were then  
187 screened for 100% stable transmission, indicating integration into the genome.  
188 Integration was confirmed by mapping the transgene to a chromosome.

189

190 ***Aldicarb assays***

191 35 mm aldicarb assay plates were poured with NGM supplemented with 1 mM  
192 aldicarb. The plates were seeded with 5  $\mu$ L OP50 and dried at room temperature  
193 overnight. Animals were picked onto the OP50 lawn to begin the assay (time 0) and  
194 then kept at room temperature. Every 15 minutes, animals were scored for paralysis by  
195 lightly touching the nose of the animal with an eyebrow hair. Animals were scored as  
196 paralyzed if the worm displayed no locomotor response to three nose touches and had  
197 no pharyngeal pumping. Animals that left the OP50 lawn were picked back onto the  
198 food.

199

200 ***Statistical analysis***

201 P values were determined using GraphPad Prism 5. Normally distributed data  
202 sets were analyzed with a one-way ANOVA and Bonferroni's *post hoc* test when group  
203 size was unequal, or with Tukey's *post hoc* test when group size was equal. Data sets  
204 with non-normal distribution (using the Shapiro-Wilk normality test) were analyzed with  
205 a Kruskal-Wallis test and Dunn's *post hoc* test. Data sets with multiple independent  
206 variables were analyzed by two-way ANOVA and Bonferroni's *post hoc* test.

207

208 ***Reagent and data availability***

209 Strains and plasmids are listed in Tables S1 and S2 and are available upon  
210 request. Primers are listed in Table S3. The authors state that all data necessary for  
211 confirming the conclusions presented in the article are represented fully within the  
212 article and Supplemental Material.

213

## 214 **Results**

215

### 216 **KSR-1 regulates locomotion downstream of Gq**

217         In *C. elegans*, the heterotrimeric G protein Gq regulates synaptic vesicle release  
218 (Hu *et al.* 2015). Gq is a key regulator of neuromuscular activity, as loss-of-function  
219 mutants in *egl-30* are nearly paralyzed (Brundage *et al.* 1996) whereas the gain-of-  
220 function mutant *egl-30(tg26)* has hyperactive locomotion with an exaggerated loopy  
221 waveform (Doi and Iwasaki 2002; Bastiani *et al.* 2003) (Figure 1A, C, D). To identify  
222 pathways required for Gq signaling, we performed a forward genetic screen in *C.*  
223 *elegans* for suppressors of the activated Gq mutant *egl-30(tg26)*. Two suppressors  
224 identified in this screen, *ox314* and *yak10*, showed similar suppression of the loopy  
225 waveform and hyperactivity of *egl-30(tg26)* animals (Figure 1D). When crossed away  
226 from the *egl-30(tg26)* background, both mutants moved with wild-type waveform (Figure  
227 1D), but at a slightly slower rate. We mapped the *ox314* allele near the center of the X  
228 chromosome (see Materials and Methods), and a complementation test showed that  
229 *ox314* and *yak10* are mutations in the same gene since they fail to complement in an  
230 *egl-30(tg26)* background.

231         We used whole genome sequencing to identify *ox314* and *yak10* as nonsense  
232 mutations in *ksr-1* (Figure 1B, see Materials and Methods). KSR-1 is a scaffold protein  
233 that facilitates the localization and interactions required for the Ras-mitogen activated  
234 protein kinase (MAPK) cascade consisting of Raf, MEK and ERK (Kornfeld *et al.* 1995b;  
235 Sundaram and Han 1995; Nguyen *et al.* 2002; Zhang *et al.* 2013). The deletion allele  
236 *ksr-1(ok786)* also suppressed the loopy waveform of the activated Gq mutant identically

237 to *ox314* and *yak10*. These results suggest that KSR-1 activity is required for regulation  
238 of locomotion rate and waveform by Gq.

239

## 240 **The ERK MAPK cascade acts to promote Gq signaling**

241 Because the loss of the MAPK scaffold *ksr-1* suppresses the activated Gq  
242 mutant *egl-30(tg26)*, we asked whether other components of the Ras-ERK pathway  
243 would also suppress. Since the core components of the Ras-ERK pathway are required  
244 for viability, we built double mutants of activated Gq with reduction-of-function mutations  
245 in genes at each step of the ERK cascade. Mutations in Raf (*lin-45(sy96)*), MEK (*mek-*  
246 *2(n1989)*, *mek-2(ku114)*), and ERK (*mpk-1(ga117)*, *mpk-1(oz140)*) all suppressed the  
247 loopy waveform of activated Gq animals similarly to *ksr-1(ok786)* (Figure 2A,B; Figure  
248 S1A,B). However, mutations in Ras (*let-60(n2021)*) and the upstream pathway  
249 activators EGF (*lin-3(e1417)*) and the EGFR (*let-23(sy12)*) did not suppress activated  
250 Gq (Figure 2C). Because *let-60* is required for viability, most *let-60* alleles including  
251 *n2021* are partial loss-of-function (Beitel *et al.* 1990). We also analyzed the dominant  
252 negative D119N allele *let-60(sy93)* that disrupts Ras binding to guanine nucleotides and  
253 thus prevents Ras activation (Han and Sternberg 1991). We found that *let-60(sy93)* also  
254 did not suppress the loopy waveform of activated Gq (Figure 2D), supporting the  
255 possibility that ERK activation occurs through a Ras-independent mechanism.

256 Because partial loss-of-function mutations in the ERK MAPK pathway genes  
257 downstream of Ras showed clear suppression of activated Gq, we were surprised to  
258 find that partial loss-of-function mutations in Ras did not suppress. If LET-60/Ras is

259 indeed not required, Gq might instead activate the ERK pathway via other Ras-  
260 subfamily proteins. To test this possibility, we made double mutants of activated Gq with  
261 putative null alleles of R-Ras/*ras-1*, M-Ras/*ras-2*, and Rap1/*rap-1* and found that they  
262 also did not suppress activated Gq (Figure S2A). To further investigate whether this  
263 pathway acts independently of Ras, we tested mutations in GEFs that activate Ras. The  
264 temperature-sensitive RasGEF mutant *sos-1(cs41)* did not suppress activated Gq when  
265 shifted to the non-permissive temperature (Figure S2B). Additionally, a null mutation in  
266 the neuronal RasGEF *rgef-1* also did not suppress activated Gq locomotion (Figure  
267 S2C), supporting the possibility that this pathway is Ras-independent. In genetic  
268 screens for vulval induction mutants, additional factors such as the PP2A subunit *sur-6*  
269 (Sieburth *et al.* 1999) and ion transporter *sur-7* (Yoder *et al.* 2004) were identified as  
270 positive regulators of Ras-ERK activity. However, the *sur-6(sv30)* and *sur-7(ku119)*  
271 mutations did not suppress activated Gq locomotion (data not shown). These data  
272 suggest either that only a low level of Ras activity is needed to properly activate ERK  
273 signaling downstream of Gq, or that ERK signaling acts independently of LET-60/Ras  
274 and other known *C. elegans* Ras family proteins to regulate locomotion downstream of  
275 Gq.

276

## 277 **KSR-1 and the ERK MAPK cascade modulate Rho signaling**

278 Three classes of suppressor mutations were isolated in our forward genetic  
279 screen of activated Gq, as characterized by their molecular role and unique suppression  
280 phenotypes (Topalidou *et al.* 2017a; b). We grouped together a class of suppressor  
281 mutations including *ox314*, *yak10*, and the RhoGEF Trio (*unc-73* in *C. elegans*) by their

282 characteristic strong suppression of the loopy waveform of activated Gq (Topalidou *et*  
283 *al.* 2017a; b), suggesting that *ksr-1* might act in the same pathway as *unc-73*.

284 We have shown that Gq regulates locomotion via the small GTPase Rho (RHO-1  
285 in *C. elegans*) (Topalidou *et al.* 2017a). Transgenic expression of an activated RHO-1  
286 mutant (G14V) in acetylcholine neurons (here called “*rho-1(gf)*”) causes worms to have  
287 a loopy waveform and impaired locomotion (McMullan *et al.* 2006) (Figure 3A). To  
288 examine whether *ksr-1* acts in the Gq-Rho pathway we tested whether mutations in *ksr-*  
289 *1* suppress the phenotypes of *rho-1(gf)* worms. We found that the *ksr-1* alleles *ok786*,  
290 *ox314*, and *yak10* all suppressed the loopy waveform of *rho-1(gf)* worms (Figure 3A).  
291 Because *rho-1(gf)* worms have a slow locomotion rate and loopy waveform, these  
292 mutants do not efficiently travel long distances. We used radial locomotion assays (see  
293 Materials and Methods) to quantify the locomotion phenotype of *rho-1(gf)* worms. *rho-*  
294 *1(gf) ksr-1* double mutants had an increased radial distance traveled compared to *rho-*  
295 *1(gf)* alone (Figure 3B). These data suggest that KSR-1 acts downstream of or in  
296 parallel to the Gq-Rho pathway to regulate locomotion.

297 Since *ksr-1* mutants suppress the exaggerated waveform of both activated Gq  
298 and activated Rho animals, we expected that loss of other ERK pathway components  
299 would also suppress activated Rho. We made double mutants of activated Rho (*rho-*  
300 *1(gf)*) with reduction-of-function alleles of the Ras-ERK pathway and found that  
301 mutations in Raf, MEK, and ERK suppressed the *rho-1(gf)* loopy waveform and  
302 decreased locomotion phenotypes (Figure 3A,C). However, the *let-60(n2021)* Ras  
303 mutation did not suppress the loopy waveform or radial locomotion defect of *rho-1(gf)*  
304 worms (Figure 3A,C). These data suggest that the ERK pathway acts downstream of or

305 in parallel to the Gq-Rho pathway to regulate locomotion, possibly in a Ras-independent  
306 manner.

307

### 308 **The ERK MAPK cascade acts in acetylcholine neurons to control locomotion**

309 Members of the ERK pathway are expressed in neurons in *C. elegans* (Dent and  
310 Han 1998; Hunt-Newbury *et al.* 2007), and Gq and Rho act in acetylcholine neurons to  
311 promote synaptic release and regulate locomotion (Lackner *et al.* 1999; McMullan *et al.*  
312 2006) To determine whether the ERK pathway also acts in neurons to modulate Gq  
313 signaling, we expressed the *ksr-1* cDNA under promoters driving expression in specific  
314 types of neurons. Single-copy transgenic expression of *ksr-1* under an acetylcholine  
315 neuron promoter (*Punc-17*) or under a head acetylcholine neuron promoter (*Punc-17H*)  
316 fully reversed the *ksr-1* suppression of the loopy waveform of activated Gq worms  
317 (Figure 4). *ksr-1* expression in ventral cord acetylcholine motor neurons (*Punc-17β*) or  
318 GABA neurons (*Punc-47*) did not significantly reverse the *ksr-1* suppression of activated  
319 Gq (Figure 4). This suggests that ERK signaling primarily functions in the acetylcholine  
320 interneurons or motor neurons of the head to modulate Gq-dependent locomotion.

321 We have shown that the ERK pathway is necessary for Gq-dependent effects on  
322 locomotion. To determine whether ERK signaling is sufficient to modulate locomotion,  
323 we expressed an activated form of *lin-45*/Raf specifically in acetylcholine neurons. Raf  
324 kinase activity is regulated via conserved phosphorylation events, and phosphomimetic  
325 mutations T626E/T629D in the kinase activation loop of *lin-45* are sufficient to confer  
326 constitutive Raf activity (Chong *et al.* 2001). We found that expression of activated Raf



327 in acetylcholine neurons (*Punc-17*) causes a loopy waveform similar to activated Gq  
328 and Rho mutants and similar limited dispersal in radial locomotion assays (Figure 5A,  
329 B).

330 To determine if Raf activation affects acetylcholine release, we assayed for  
331 sensitivity to the acetylcholinesterase inhibitor aldicarb. Mutants with reduced  
332 acetylcholine secretion are resistant to aldicarb, whereas mutants with increased  
333 acetylcholine secretion are hypersensitive to aldicarb (Mahoney *et al.* 2006). Activated  
334 Gq and Rho mutants have increased rates of paralysis when exposed to aldicarb  
335 (Lackner *et al.* 1999; McMullan *et al.* 2006) . We found that expression of activated Raf  
336 in acetylcholine neurons also led to aldicarb hypersensitivity, similar to activated Gq and  
337 Rho mutants (Figure 5C). However, we found that a *ksr-1* mutation does not suppress  
338 the aldicarb hypersensitivity of an activated Gq mutant, and the *ksr-1* mutant on its own  
339 has similar aldicarb sensitivity to wild type (Figure 5D). These results suggest that the  
340 ERK pathway is not necessary for synaptic transmission, but is sufficient to stimulate  
341 synaptic transmission when constitutively activated.

342

## 343 **Discussion**

344           In this study we identified KSR-1 and the ERK MAPK cascade as downstream  
345 modulators of Gq-Rho signaling. We found that ERK signaling acts in the acetylcholine  
346 interneurons or motor neurons of the head to modulate Gq-dependent locomotion. We  
347 also found that activation of the MAPKKK Raf/LIN-45 in acetylcholine neurons causes  
348 increased sensitivity to the acetylcholinesterase inhibitor aldicarb, probably reflecting  
349 increased release of acetylcholine at neuromuscular synapses. Our data support the  
350 model that Gq-Rho activation of the ERK pathway may be independent of its canonical  
351 regulator, the small GTPase Ras/LET-60 (Figure 6).

352           The ERK signaling cascade has been well-studied for its regulation of cellular  
353 proliferation and differentiation (Sun *et al.* 2015), but also plays important roles in  
354 mature neurons and has been associated with synaptic plasticity and memory (Impey *et al.*  
355 1999). In addition to activating transcription, ERKs regulate synaptic plasticity both  
356 presynaptically and postsynaptically by phosphorylating relevant substrates. ERKs  
357 phosphorylate the presynaptic proteins synapsin I and Munc18-1, and postsynaptic  
358 proteins such as scaffolds, K<sub>v</sub>4.2 potassium channels, and Group I metabotropic  
359 glutamate receptors (Jovanovic *et al.* 2000; Thomas and Huganir 2004; Sweatt 2004;  
360 Kushner *et al.* 2005; Boggio *et al.* 2007; Vara *et al.* 2009; Mao and Wang 2016a;  
361 Schmitz *et al.* 2016). Our findings suggest that the ERK pathway controls Gq-dependent  
362 locomotion in *C. elegans* and that activated ERK promotes synaptic transmission.

363           In contrast to many developmental and neuronal roles of Ras-dependent ERK  
364 signaling in *C. elegans*, our data suggest that Raf-MEK-ERK signaling may modulate  
365 Gq-Rho output independently of Ras/LET-60. One caveat to the conclusion that the

366 ERK pathway acts independently of Ras to control Gq-dependent locomotion is that the  
367 alleles of *let-60*/Ras tested here are not null (Han and Sternberg 1990, 1991; Han *et al.*  
368 1990; Beitel *et al.* 1990). However, other than *mpk-1(ga117)*, the alleles we used of *lin-*  
369 *45*, *mek-2* and *mpk-1* are also not null (Han *et al.* 1993; Kornfeld *et al.* 1995a; Wu *et al.*  
370 1995; Lackner and Kim 1998; Hsu *et al.* 2002), yet were able to suppress an activated  
371 Gq mutant. Furthermore, the *let-60*/Ras alleles used here have stronger phenotypes in  
372 vulval development than the two weak *mek-2*/MEK alleles we used (*n1989* and *ku114*)  
373 (Beitel *et al.* 1990; Kornfeld *et al.* 1995a; Wu *et al.* 1995) and the *let-60(n2021)*/Ras  
374 mutant has comparable phenotypes to the *lin-45(sy96)*/Raf and *mpk-1(ga117)*/ERK  
375 alleles for chemotaxis to odorants and the regulation of foraging behavior (Hirotsu *et al.*  
376 2000; Hamakawa *et al.* 2015). Thus, either LET-60/Ras is not required to modulate Gq  
377 signaling, or ERK signaling in the locomotor circuit requires a lower threshold of Ras  
378 activity and the *let-60* mutants we used have sufficient levels of active Ras to modulate  
379 Gq signaling, but not enough for vulval induction or other behaviors.

380         If Ras is not required, how instead might KSR-Raf-MEK-ERK signaling be  
381 activated? Normally, active Ras recruits Raf to the plasma membrane but it has been  
382 shown that artificial recruitment of Raf to the plasma membrane in the absence of Ras  
383 is sufficient to activate Raf signaling (Stokoe *et al.* 1994; Marais *et al.* 1995). Thus,  
384 another possible way to activate the ERK pathway would be for Raf to be recruited to  
385 the membrane by proteins other than Ras. The most obvious candidates for recruiting  
386 Raf are other members of the Ras family such as Rap1 or R-Ras that have a conserved  
387 effector-binding domain (Reiner and Lundquist 2016); it has been reported that Rap1  
388 can mediate Ras-independent activation of Raf downstream of a Gq-coupled receptor

389 (Guo *et al.* 2001). However, mutations in the worm orthologs of Rap1/RAP-1 and R-  
390 Ras/RAS-1 did not suppress the activated Gq mutant, indicating that these Ras-like  
391 proteins are not required, at least individually, to activate Raf in this pathway. It is  
392 possible that more than one of these Ras family members function redundantly to  
393 activate Raf, or that Raf is activated completely independently of Ras family proteins.  
394 There have been other reported cases of Ras-independent activation of the Raf-MEK-  
395 ERK pathway (Robbins *et al.* 1992; Honda *et al.* 1994; van Biesen *et al.* 1996; Ueda *et*  
396 *al.* 1996; Drosten *et al.* 2014), some of which involve G protein signaling and protein  
397 kinase C, though the precise mechanisms involved are unclear.

398 Gq, Rho, and ERK are also required for the *C. elegans* behavioral and immune  
399 response to infection by the bacterium *M. nematophilum* (Nicholas and Hodgkin 2004;  
400 McMullan *et al.* 2012). Interestingly, LET-60/Ras was reported to not be required for the  
401 immune response (Nicholas and Hodgkin 2004) or only partially required (McMullan *et*  
402 *al.* 2012). Additionally, LET-60/Ras was not required for the increased sensitivity to  
403 aldicarb caused by infection (McMullan *et al.* 2012), at least as assayed using the *let-*  
404 *60(n2021)* allele. Thus, the same neuronal Ras-independent ERK pathway we describe  
405 here appears to also modulate Gq signaling in the neuronal response to bacterial  
406 infection and possibly the innate immune response as well.

407 Our epistasis analysis suggests that ERK signaling acts genetically downstream  
408 of or in parallel to Gq-Rho signaling. How might Gq-Rho signaling lead to ERK  
409 activation? ERK activation could occur via a linear pathway downstream of Gq and Rho,  
410 or ERK could signal in parallel and converge downstream of Rho to affect neuronal  
411 activity (Figure 6). There is precedence for Gq activating ERK via a linear pathway. In

412 the pharyngeal muscle of *C. elegans*, ERK activity is increased by Gq-dependent  
413 signaling through protein kinase C (You *et al.* 2006). In the AWC olfactory neuron, ERK  
414 activity is increased downstream of Gq signaling via the RasGEF RGEF-1 (Chen *et al.*  
415 2011; Uozumi *et al.* 2012). Protein kinase C and RGEF-1 are both activated by DAG,  
416 probably produced by the canonical Gq-PLC $\beta$  pathway. By contrast, we found that ERK  
417 signaling regulates locomotion by modulating the output of the Gq-Rho pathway that  
418 acts in parallel to Gq-PLC $\beta$ , and does not depend on RGEF-1.

419         How might the ERK pathway modulate neuronal activity downstream of Gq-Rho  
420 signaling? Rho regulates neuronal activity and synaptic release through several  
421 mechanisms in *C. elegans* neurons, any of which could be targets of ERK signaling.  
422 One possible ERK effector is the NCA/NALCN cation channel that acts genetically  
423 downstream of Gq-Rho to regulate locomotion rate and waveform (Topalidou *et al.*  
424 2017a; b). Though ERK has not been directly connected to NCA/NALCN, mammalian  
425 ERK regulates neuronal excitability by directly phosphorylating voltage-gated sodium  
426 and potassium channels (Schrader *et al.* 2006; Stambouliau *et al.* 2010) and by  
427 regulating channel expression (Yang *et al.* 2015). Given the many possible ways that  
428 ERK may regulate excitability or synaptic transmission, *C. elegans* genetics is well  
429 suited to determine relevant effectors of Gq-Rho-ERK signaling.

430

431 **Acknowledgements**

432           We thank Stephen Nurrish for the activated Rho worm strain; Jordan and Jill  
433 Hoyt for help with Galaxy analysis; Laura Taylor for help with irradiation of  
434 extrachromosomal arrays; Dana Miller for use of her Nikon SMZ18 microscope and  
435 camera. Some strains were provided by the CGC, which is funded by the NIH Office of  
436 Research Infrastructure Programs (P40 OD010440). This work was supported by an  
437 Ellison Medical Foundation New Scholar Award and by NIH grants R00 MH082109 and  
438 R56 NS100843 to M.A.

439 **Figure Legends**

440 **Figure 1.** *ksr-1* mutations suppress activated Gq.

441 (A) A *ksr-1* mutation suppresses the exaggerated body bends of activated Gq. The  
442 activated Gq mutant *egl-30(tg26)* has small size and deep body bends. *ksr-1(ok786)*  
443 suppresses the exaggerated body bends and small size of *egl-30(tg26)* worms.

444 (B) Gene structure of *ksr-1* locus. Locations of the *egl-30(tg26)* suppressor alleles  
445 *ox314* and *yak10* are indicated, as well as the position of the *ok786* deletion. The gene  
446 structure was drawn using Exon-Intron Graphic Maker ([www.wormweb.org/exonintron](http://www.wormweb.org/exonintron))

447 (C) A *ksr-1* mutation suppresses the exaggerated body bend waveform of *egl-30(tg26)*  
448 mutants. Straightened images of tracks left in bacterial lawns show similar waveform for  
449 wild type and *ksr-1(ok786)* worms. *egl-30(tg26)* mutants have an exaggerated  
450 waveform, creating tracks with a large amplitude relative to the period. *ksr-1(ok786)*  
451 suppresses the exaggerated body bends of *egl-30(tg26)* mutants.

452 (D) A *ksr-1* mutation suppresses the *egl-30(tg26)* waveform. *ksr-1* nonsense alleles  
453 *ox314* and *yak10* and the deletion allele *ok786* strongly suppress the *egl-30(tg26)*  
454 exaggerated waveform.  $N \geq 12$  \*\*\*  $P < 0.001$ , one-way ANOVA with Bonferroni's *post*  
455 *hoc* test.

456

457 **Figure 2.** Mutations in the ERK MAPK pathway suppress activated Gq.

458 (A) Mutations in the MAPKKK *lin-45/Raf*, the MAPKK *mek-2/MEK*, and the MAPK *mpk-*  
459 *1/ERK* suppress the exaggerated waveform of *egl-30(tg26)* worms. Partial loss of Ras  
460 *let-60* activity does not suppress activated Gq waveform.

461 (B) Waveform quantification of ERK pathway mutants show levels of *egl-30(tg26)*  
462 suppression similar to *ksr-1* alleles.  $N \geq 12$  \*\*\*  $P < 0.001$ , one-way ANOVA with  
463 Bonferroni's *post hoc* test.

464 (C) Signaling pathways upstream of the ERK pathway do not suppress activated Gq.  
465 Mutations in the EGFR (*let-23*) or the EGF ligand (*lin-3*) do not affect the exaggerated  
466 waveform of *egl-30(tg26)* animals. The Ras partial loss-of-function mutation *let-*  
467 *60(n2021)* does not suppress activated Gq waveform.  $N \geq 12$  \*\*\*  $P < 0.001$ , one-way  
468 ANOVA with Bonferroni's *post hoc* test.

469 (D) The *let-60(sy93)* dominant negative mutation in Ras does not suppress activated Gq  
470 waveform.  $N \geq 13$ , n.s., not significant, one-way ANOVA with Bonferroni's *post hoc* test.  
471

472 **Figure 3.** Mutations in *ksr-1* and the ERK pathway suppress activated Rho.

473 (A) Mutations in the ERK pathway visibly suppress the exaggerated body bends of  
474 animals expressing an activated Rho mutant (G14V) in acetylcholine neurons  
475 (*nzIs29[Punc-17::rho-1(gf)]*). Reduction of LET-60/Ras activity does not suppress the  
476 activated Rho waveform.

477 (B) The *ksr-1(ok786)*, *ksr-1(ox314)*, and *ksr-1(yak10)* mutations suppress the  
478 locomotion of activated Rho animals as shown by radial locomotion assay.  $N \geq 38$  \*\*\*  $P$   
479  $< 0.001$ , \*\*  $P < 0.01$ , Kruskal-Wallis test with Dunn's *post hoc* test.

480 (C) Mutations in *lin-45* and *mek-2* suppresses the locomotion defect of activated Rho  
481 animals as shown by radial locomotion assays. The *let-60(n2021)* and *mpk-1(ga117)*  
482 mutations do not significantly suppress activated Rho locomotion.  $N \geq 50$  \*\*\*  $P < 0.001$ ,  
483 Kruskal-Wallis test with Dunn's *post hoc* test.



484

485 **Figure 4.** KSR-1 acts in acetylcholine neurons to modulate Gq signaling.

486 Single-copy expression of the *ksr-1* cDNA exclusively in acetylcholine neurons (*Punc-*  
487 *17, yakSi26* transgene) or head acetylcholine neurons (*Punc-17H, yakSi27* transgene)  
488 is sufficient to reverse the *ksr-1* suppression of the loopy waveform of activated Gq  
489 animals. *ksr-1* expression in ventral cord acetylcholine neurons (*Punc-17 $\beta$ , yakSi28*  
490 transgene) or GABA neurons (*Punc-47, yakSi29* transgene) does not reverse the *ksr-1*  
491 suppression of the activated Gq exaggerated waveform.  $N \geq 12$  \*\*\*  $P < 0.001$ , \*\*  $P <$   
492  $0.01$ , n.s., not significant, Kruskal-Wallis test with Dunn's *post hoc* test.

493

494 **Figure 5.** Increased ERK signaling in acetylcholine neurons is sufficient to regulate  
495 locomotion and increase acetylcholine release.

496 (A) Transgenic lines expressing an activated form of *lin-45* (T626E/T629D) in  
497 acetylcholine neurons (*yakIs34[Punc-17::lin-45(gf)]*) have exaggerated body bends and  
498 coiling behavior similar to the activated Gq mutant *egl-30(tg26)* and to animals  
499 expressing activated Rho in acetylcholine neurons (*nzIs29[Punc-17::rho-1(gf)]*). The  
500 wild type and *egl-30(tg26)* photos are the same as shown in Figure 1A, while the *rho-*  
501 *1(gf)* photos is the same as the one in Figure 3A.

502 (B) Expression of activated Rho (*nzIs29[Punc-17::rho-1(gf)]*) or Raf (*yakIs34[Punc-*  
503 *17::lin-45(gf)]*) in acetylcholine neurons impairs coordinated locomotion similarly to  
504 activated Gq (*egl-30(tg26)*).  $N \geq 19$  \*  $P < 0.05$ , \*\*\*  $P < 0.001$ , Kruskal-Wallis test with  
505 Dunn's *post hoc* test.

506 (C) Animals expressing activated Gq, Rho, or Raf are hypersensitive to the  
507 acetylcholinesterase inhibitor aldicarb. Activated Gq (*egl-30(tg26)*), activated Rho  
508 expressed in acetylcholine neurons (*nzIs29[Punc-17::rho-1(gf)]*), and activated Raf  
509 expressed in acetylcholine neurons *yakIs34[Punc-17::lin-45(gf)]* become paralyzed  
510 significantly faster than wild type animals when exposed to 1 mM aldicarb. All strains  
511 are significantly different from wild type at t = 60, 75, 90, and 105 minutes.  $N \geq 61$  \*\*\*  $P$   
512  $< 0.001$ , two-way ANOVA with Bonferroni's *post hoc* test.

513 (D) *ksr-1* is not necessary for the aldicarb hypersensitivity of activated Gq. Paralysis of  
514 *ksr-1(ok786)* animals on 1 mM aldicarb is not significantly different from wild type. The  
515 *ksr-1* deletion *ok786* does not suppress the aldicarb hypersensitivity of activated Gq  
516 (*egl-30(tg26)*).  $N \geq 53$ .

517

518 **Figure 6.** Model for Gq-Rho-ERK signaling. Gq directly activates Trio and Rho (solid  
519 arrow) (Lutz et al. 2007). The core ERK cascade acts either downstream of Rho or in  
520 parallel (dashed arrows) to modulate locomotion. ERK activation occurs independently  
521 of the extracellular growth factor LIN-3, its receptor LET-23, or Ras/LET-60. It is  
522 possible that Raf/LIN-45 is activated by a Ras family member other than the canonical  
523 worm Ras/LET-60.

524

525 **Figure S1.** Additional mutations in *mek-2* and *mpk-1* suppress activated Gq.

526 (A) The *mek-2(ku114)* mutation suppresses the exaggerated waveform of *egl-30(tg26)*  
527 worms.  $N \geq 14$  \*\*\*  $P < 0.001$ , one-way ANOVA with Bonferroni's *post hoc* test.

528

529 (B) The *mpk-1(oz140)* mutation suppresses the exaggerated waveform of *egl-30(tg26)*  
530 worms.  $N \geq 12$  \*\*\*  $P < 0.001$ , one-way ANOVA with Bonferroni's *post hoc* test.

531

532 **Figure S2.** Gq-dependent locomotion does not depend on the RasGEFs *sos-1* and  
533 *rgef-1*, or the Ras family members *ras-1*, *ras-2*, and *rap-1*.

534 (A) Deletion mutations *ras-1(gk243)* and *ras-2(ok682)*, or the nonsense mutation *rap-*  
535 *1(pk2082)* do not suppress the waveform of the activated Gq mutant *egl-30(tg26)*.  $N \geq$   
536 18, n.s., not significant, one-way ANOVA with Bonferroni's *post hoc* test.

537 (B) Loss of the RasGEF *sos-1* does not suppress activated Gq waveform. Temperature  
538 sensitive *egl-30(tg26); sos-1(cs41)* mutant animals were incubated for 24 hours at the  
539 non-permissive temperature of 25° and assayed for their waveform.  $N \geq 15$ , n.s., not  
540 significant, one-way ANOVA with Tukey's *post hoc* test.

541 (C) The RasGEF deletion mutation *rgef-1(ok675)* does not suppress the exaggerated  
542 waveform of activated Gq.  $N = 16$ , n.s., not significant, one-way ANOVA with Tukey's  
543 *post hoc* test.

544

545 **Figure S3.** Expression of activated LIN-45/Raf in head acetylcholine neurons is  
546 sufficient to cause locomotion with exaggerated body bends.

547 The *yakIs34[Punc-17::lin-45(gf)]* integrated array expressing activated *lin-*  
548 *45(T626E/T629D)* in all acetylcholine neurons and the *yakEx154[Punc-17H::lin-45(gf)]*  
549 extrachromosomal array expressed in head acetylcholine neurons both cause  
550 exaggerated body bends and coiled locomotion.  $N \geq 12$  \*\*\*  $P < 0.001$ , \*  $P < 0.05$ ,

551 Kruskal-Wallis test with Dunn's *post hoc* test.

552 **Table S1. List of strains**

|     |        |                                                      |
|-----|--------|------------------------------------------------------|
| 553 | N2     | Bristol wild strain                                  |
| 554 | XZ1151 | <i>egl-30(tg26) I</i>                                |
| 555 | EG6699 | <i>ttTi5605 II; unc-119(ed3) III</i>                 |
| 556 | EG6207 | <i>unc-119(ed3) III</i>                              |
| 557 | RB915  | <i>ksr-1(ok786) X</i>                                |
| 558 | EG4782 | <i>nzIs29[Punc-17::rho-1(G14V), unc-122::gfp] II</i> |
| 559 | MT4866 | <i>let-60(n2021) IV</i>                              |
| 560 | PS436  | <i>let-60(sy93) IV</i>                               |
| 561 | PS427  | <i>lin-45(sy96) IV</i>                               |
| 562 | MT8666 | <i>mek-2(n1989) I</i>                                |
| 563 | SD378  | <i>mpk-1(ga117) / dpy-17(e164) unc-79(e1068) III</i> |
| 564 | CB1417 | <i>lin-3(e1417) IV</i>                               |
| 565 | PS5131 | <i>let-23(sy12) / mIn1[dpy-10(e128) mIs14] II</i>    |
| 566 | UP604  | <i>sos-1(cs41) V</i>                                 |
| 567 | VC450  | <i>ras-1(gk243) II</i>                               |
| 568 | RB852  | <i>ras-2(ok682) III</i>                              |
| 569 | TZ181  | <i>rap-1(pk2082) IV</i>                              |
| 570 | RB848  | <i>rgef-1(ok675) V</i>                               |
| 571 | MH538  | <i>mek-2(ku114) I; let-60(n1046) IV</i>              |
| 572 | MT8186 | <i>mpk-1(oz140)/unc-79(e1068) dpy-17(e164) III</i>   |

573

574 **The following strains were produced during this study:**

|     |        |                                        |
|-----|--------|----------------------------------------|
| 575 | EG314  | <i>ksr-1(ox314) X</i>                  |
| 576 | XZ10   | <i>ksr-1(yak10) X</i>                  |
| 577 | EG4198 | <i>egl-30(tg26) I ; ksr-1(ox314) X</i> |
| 578 | XZ1340 | <i>egl-30(tg26) I ; ksr-1(yak10) X</i> |
| 579 | XZ1511 | <i>egl-30(tg26) I; ksr-1(ok786) X</i>  |

580 XZ1465 *nzls29[Punc-17::rho-1(G14V), unc-122::gfp] II; ksr-1(ox314) X*

581 XZ1547 *nzls29[Punc-17::rho-1(G14V), unc-122::gfp] II; ksr-1(yak10) X*

582 XZ2042 *nzls29[Punc-17::rho-1(G14V), unc-122::gfp] II; ksr-1(ok786) X*

583 XZ1615 *egl-30(tg26) I; let-60(n2021) / nT1[qIs51(Pmyo-2::GFP; Ppes-10::GFP; F22B7.9::GFP)] IV*

584 XZ1626 *egl-30(tg26) I; lin-3(e1417) IV*

585 XZ1630 *egl-30(tg26) I; let-23(sy12) / mln1[dpy-10(e128) mls14] II*

586 XZ1677 *nzls29[Punc-17::rho-1(G14V), unc-122::gfp] II; let-60(n2021) / nT1[qIs51(Pmyo-2::GFP;*

587 *Ppes-10::GFP; F22B7.9::GFP)] IV*

588 XZ1548 *egl-30(tg26) I; lin-45(sy96) IV*

589 XZ1556 *nzls29[Punc-17::rho-1(G14V), unc-122::gfp] II; lin-45(sy96) IV*

590 XZ1850 *egl-30(tg26) mek-2(n1989) / hT2[bli-4(e937) let(q782) qIs48] I*

591 XZ1851 *mek-2(n1989) / hT2[bli-4(e937) let(q782) qIs48] I; nzls29[Punc-17::rho-1(G14V), unc-*

592 *122::gfp] II*

593 XZ1700 *mpk-1(ga117) / qC1[dpy-19(e1259) glp-1(q339) qIs26(Plag-2::GFP, rol-6(su1006))] III*

594 XZ1668 *egl-30(tg26) I; mpk-1(ga117) / qC1[dpy-19(e1259) glp-1(q339) qIs26(Plag-2::GFP, rol-*

595 *6(su1006))] III*

596 XZ2043 *nzls29[Punc-17::rho-1(G14V), unc-122::gfp] II; mpk-1(ga117) / qC1[dpy-19(e1259) glp-*

597 *1(q339) qIs26(Plag-2::GFP, rol-6(su1006))] III*

598 XZ2046 *egl-30(tg26) I; sos-1(cs41) V*

599 XZ1855 *egl-30(tg26) I; ras-1(gk243) II*

600 XZ1856 *egl-30(tg26) I; ras-2(ok682) III*

601 XZ2045 *egl-30(tg26) I; rap-1(pk2082) IV*

602 XZ2101 *egl-30(tg26) I; rgef-1(ok675) V*

603 XZ1921 *egl-30(tg26) sur-6(sv30) / hT2[bli-4(e937) let(q782) qIs48] I*

604 XZ1857 *egl-30(tg26) I; sur-7(ku119) X*

605 XZ1854 *nzls29[Punc-17::rho-1(G14V), unc-122::gfp] II; ras-2(ok682) III*

606 XZ1852 *nzls29[Punc-17::rho-1(G14V), unc-122::gfp] II; rap-1(pk2082) IV*

607 XZ1880 *yakSi26[Punc-17::ksr-1 cDNA::tbb-2 3'UTR::OPERON::GFP] II*

|     |                                          |                                                                                                |
|-----|------------------------------------------|------------------------------------------------------------------------------------------------|
| 608 | XZ1881                                   | <i>yakSi27[Punc-17H::ksr-1 cDNA::tbb-2 3'UTR::OPERON::GFP] II</i>                              |
| 609 | XZ1882                                   | <i>yakSi28[Punc-17β::ksr-1 cDNA::tbb-2 3'UTR::OPERON::GFP] II</i>                              |
| 610 | XZ1883                                   | <i>yakSi29[Punc-47::ksr-1 cDNA::tbb-2 3'UTR::OPERON::GFP] II</i>                               |
| 611 | XZ1884                                   | <i>egl-30(tg26) I; yakSi26[Punc-17::ksr-1 cDNA::tbb-2 3'UTR::OPERON::GFP] II; ksr-1(ok786)</i> |
| 612 | X                                        |                                                                                                |
| 613 | XZ1885                                   | <i>egl-30(tg26) I; yakSi27[Punc-17H::ksr-1 cDNA::tbb-2 3'UTR::OPERON::GFP] II; ksr-</i>        |
| 614 | <i>1(ok786) X</i>                        |                                                                                                |
| 615 | XZ1946                                   | <i>egl-30(tg26) I; yakSi28[Punc-17β::ksr-1 cDNA::tbb-2 3'UTR::OPERON::GFP] II; ksr-</i>        |
| 616 | <i>1(ok786) X</i>                        |                                                                                                |
| 617 | XZ1947                                   | <i>egl-30(tg26) I; yakSi29[Punc-47::ksr-1 cDNA::tbb-2 3'UTR::OPERON::GFP] II; ksr-1(ok786)</i> |
| 618 | X                                        |                                                                                                |
| 619 | XZ2015                                   | <i>unc-119(ed3) III; yakEx122[Punc-17::lin-45* cDNA::tbb-2 3'UTR::OPERON::GFP, Pmyo-</i>       |
| 620 | <i>3::mCherry]</i>                       |                                                                                                |
| 621 | XZ2077                                   | <i>egl-30(tg26) I; let-60(sy93) IV</i>                                                         |
| 622 | XZ2106                                   | <i>egl-30(tg26) I; let-60(sy93) / nT1[qIs51(Pmyo-2::GFP; Ppes-10::GFP; F22B7.9::GFP)] IV</i>   |
| 623 | XZ2050                                   | <i>unc-119(ed3) III; yakIs34[Punc-17::lin-45* cDNA::tbb-2 3'UTR::OPERON::GFP, Pmyo-</i>        |
| 624 | <i>3::mCherry] X</i>                     |                                                                                                |
| 625 | XZ2130                                   | <i>egl-30(tg26) I; mpk-1(oz140) / oxTi619[Peft-3::TdTomato::H2B cb-unc-119(+)] III</i>         |
| 626 | XZ2131                                   | <i>egl-30(tg26) mek-2(ku114) I / hT2[bli-4(e937) let(q782) qIs48] I; III</i>                   |
| 627 | XZ2119                                   | <i>ttTi5605 II; unc-119(ed3) III; yakEx154[Punc-17H::lin-45*::tbb-2 3'UTR::OPERON::GFP,</i>    |
| 628 | <i>Pmyo-2::mCherry, Pmyo-3::mCherry]</i> |                                                                                                |
| 629 |                                          |                                                                                                |
| 630 | <b>Table S2. List of plasmids</b>        |                                                                                                |
| 631 | <u>Gateway destination vectors</u>       |                                                                                                |
| 632 | pCFJ150                                  | Gateway destination vector for insertion at chr II Mos site ttTi5605                           |
| 633 |                                          |                                                                                                |
| 634 | <u>Gateway entry clones</u>              |                                                                                                |
| 635 | pEGB05                                   | <i>Prab-3 [4-1]</i>                                                                            |

|     |                                      |                                                                                        |
|-----|--------------------------------------|----------------------------------------------------------------------------------------|
| 636 | pGH1                                 | <i>Punc-17</i> [4-1]                                                                   |
| 637 | pADA180                              | <i>Punc-17H</i> [4-1] (head acetylcholine neurons)                                     |
| 638 | pMA23                                | <i>Punc-17<math>\beta</math></i> [4-1] (body acetylcholine neurons)                    |
| 639 | pMH522                               | <i>Punc-47</i> [4-1]                                                                   |
| 640 | pBC11                                | <i>ksr-1</i> cDNA [1-2]                                                                |
| 641 | pBC26                                | <i>lin-45</i> cDNA [1-2]                                                               |
| 642 | pBC35                                | <i>lin-45*</i> (T626E/T629D) cDNA [1-2]                                                |
| 643 | pCFJ326                              | <i>tbb-2</i> 3'UTR::OPERON::GFP [2-3]                                                  |
| 644 |                                      |                                                                                        |
| 645 | <u>Gateway expression constructs</u> |                                                                                        |
| 646 | pBC13                                | <i>Prab-3::ksr-1</i> cDNA:: <i>tbb-2</i> 3'UTR::OPERON::GFP_pCFJ150                    |
| 647 | pBC31                                | <i>Punc-17::ksr-1</i> cDNA:: <i>tbb-2</i> 3'UTR::OPERON::GFP_pCFJ150                   |
| 648 | pBC32                                | <i>Punc-17H::ksr-1</i> cDNA:: <i>tbb-2</i> 3'UTR::OPERON::GFP_pCFJ150                  |
| 649 | pBC33                                | <i>Punc-17<math>\beta</math>::ksr-1</i> cDNA:: <i>tbb-2</i> 3'UTR::OPERON::GFP_pCFJ150 |
| 650 | pBC34                                | <i>Punc-47::ksr-1</i> cDNA:: <i>tbb-2</i> 3'UTR::OPERON::GFP_pCFJ150                   |
| 651 | pBC37                                | <i>Punc-17::lin-45*</i> cDNA:: <i>tbb-2</i> 3'UTR::OPERON::GFP_pCFJ150                 |
| 652 | pBC44                                | <i>Punc-17H::lin-45*</i> cDNA:: <i>tbb-2</i> 3'UTR::OPERON::GFP_pCFJ150                |

653

654 **Table S3. List of primers**

|     |        |                                                             |
|-----|--------|-------------------------------------------------------------|
| 655 | oBC011 | Forward <i>ksr-1</i> cDNA for Gateway [1-2] ENTR vector     |
| 656 |        | GGGGACAAGTTTGTACAAAAAAGCAGGCTCAatgatgcaaaccgaagtgc          |
| 657 | oBC012 | Reverse <i>ksr-1</i> cDNA for Gateway [1-2] ENTR vector     |
| 658 |        | GGGGACCACTTTGTACAAGAAAGCTGGGTGaatgtcgactcgtaactttcatc       |
| 659 | oBC085 | Forward <i>lin-45</i> cDNA for Gateway [1-2] ENTR vector    |
| 660 |        | GGGGACAAGTTTGTACAAAAAAGCAGGCTcaATGAGTCGGATTAATTTCAAAAAG     |
| 661 | oBC086 | Reverse <i>lin-45</i> cDNA for Gateway [1-2] ENTR vector    |
| 662 |        | GGGGACCACTTTGTACAAGAAAGCTGGGTgCTAAATGAGACCATAGACATTGTAGTATG |

663

664 oBC094 Reverse *lin-45* T626E mutagenesis  
665 gttcactgtccatttcgtttgacctctgccaagccgaaatctccaatttt  
666 oBC095 Forward *lin-45* T626E mutagenesis  
667 aaaattggagatttcggcttggcagagggtcaaaacgaaatggacagtgaac  
668 oBC096 Reverse *lin-45* T629D mutagenesis  
669 cctccgttcaactgtccatttatctttgacctctgccaagccga  
670 oBC097 Forward *lin-45* T629D mutagenesis  
671 tcggcttggcagagggtcaaagataaatggacagtgaacggagg  
672



673 **Literature Cited**

- 674 Afgan E., Baker D., Beek M. van den, Blankenberg D., Bouvier D., *et al.*, 2016 The Galaxy  
675 platform for accessible, reproducible and collaborative biomedical analyses: 2016  
676 update. *Nucleic Acids Res.* 44: W3–W10.
- 677 Ailion M., Hannemann M., Dalton S., Pappas A., Watanabe S., *et al.*, 2014 Two Rab2  
678 interactors regulate dense-core vesicle maturation. *Neuron* 82: 167–180.
- 679 Bastiani C. A., Gharib S., Simon M. I., Sternberg P. W., 2003 *Caenorhabditis elegans*  $G\alpha_q$   
680 Regulates Egg-Laying Behavior via a PLC $\beta$ -Independent and Serotonin-Dependent  
681 Signaling Pathway and Likely Functions Both in the Nervous System and in Muscle.  
682 *Genetics* 165: 1805–1822.
- 683 Beitel G. J., Clark S. G., Horvitz H. R., 1990 *Caenorhabditis elegans* ras gene *let-60* acts as a  
684 switch in the pathway of vulval induction. *Nature* 348: 503–509.
- 685 Boggio E. M., Putignano E., Sassoè-Pognetto M., Pizzorusso T., Giustetto M., 2007 Visual  
686 Stimulation Activates ERK in Synaptic and Somatic Compartments of Rat Cortical  
687 Neurons with Parallel Kinetics. *PLoS ONE* 2: e604.
- 688 Boulton T. G., Nye S. H., Robbins D. J., Ip N. Y., Radzlejewska E., *et al.*, 1991 ERKs: A family of  
689 protein-serine/threonine kinases that are activated and tyrosine phosphorylated in  
690 response to insulin and NGF. *Cell* 65: 663–675.
- 691 Brundage L., Avery L., Katz A., Kim U. J., Mendel J. E., *et al.*, 1996 Mutations in a *C. elegans*  
692 *Gqalpha* gene disrupt movement, egg laying, and viability. *Neuron* 16: 999–1009.

- 693 Chan J. P., Hu Z., Sieburth D., 2012 Recruitment of sphingosine kinase to presynaptic  
694 terminals by a conserved muscarinic signaling pathway promotes neurotransmitter  
695 release. *Genes Dev.* 26: 1070–1085.
- 696 Chen L., Fu Y., Ren M., Xiao B., Rubin C. S., 2011 A RasGRP, *C. elegans* RGEF-1b, Couples  
697 External Stimuli to Behavior by Activating LET-60 (Ras) in Sensory Neurons. *Neuron*  
698 70: 51–65.
- 699 Chong H., Lee J., Guan K. L., 2001 Positive and negative regulation of Raf kinase activity and  
700 function by phosphorylation. *EMBO J.* 20: 3716–3727.
- 701 Cingolani P., Platts A., Wang L. L., Coon M., Nguyen T., *et al.*, 2012 A program for annotating  
702 and predicting the effects of single nucleotide polymorphisms, SnpEff: SNPs in the  
703 genome of *Drosophila melanogaster* strain w1118; iso-2; iso-3. *Fly* 6: 80–92.
- 704 Davis M. W., Hammarlund M., Harrach T., Hullett P., Olsen S., *et al.*, 2005 Rapid single  
705 nucleotide polymorphism mapping in *C. elegans*. *BMC Genomics* 6: 118.
- 706 Dent J. A., Han M., 1998 Post-embryonic expression pattern of *C. elegans* let-60 ras reporter  
707 constructs. *Mech. Dev.* 72: 179–182.
- 708 DePristo M. A., Banks E., Poplin R., Garimella K. V., Maguire J. R., *et al.*, 2011 A framework  
709 for variation discovery and genotyping using next-generation DNA sequencing data.  
710 *Nat. Genet.* 43: 491–498.
- 711 Doi M., Iwasaki K., 2002 Regulation of retrograde signaling at neuromuscular junctions by  
712 the novel C2 domain protein AEX-1. *Neuron* 33: 249–259.

- 713 Drosten M., Sum E. Y. M., Lechuga C. G., Simón-Carrasco L., Jacob H. K. C., *et al.*, 2014 Loss of  
714 p53 induces cell proliferation via Ras-independent activation of the Raf/Mek/Erk  
715 signaling pathway. *Proc. Natl. Acad. Sci. U. S. A.* 111: 15155–15160.
- 716 Frøkjær-Jensen C., Davis M. W., Ailion M., Jorgensen E. M., 2012 Improved Mos1-mediated  
717 transgenesis in *C. elegans*. *Nat. Methods* 9: 117–118.
- 718 Guo F. F., Kumahara E., Saffen D., 2001 A CalDAG-GEFI/Rap1/B-Raf cassette couples M(1)  
719 muscarinic acetylcholine receptors to the activation of ERK1/2. *J. Biol. Chem.* 276:  
720 25568–25581.
- 721 Hamakawa M., Uozumi T., Ueda N., Iino Y., Hirotsu T., 2015 A role for Ras in inhibiting  
722 circular foraging behavior as revealed by a new method for time and cell-specific  
723 RNAi. *BMC Biol.* 13: 6.
- 724 Han M., Sternberg P. W., 1990 *let-60*, a gene that specifies cell fates during *C. elegans* vulval  
725 induction, encodes a ras protein. *Cell* 63: 921–931.
- 726 Han M., Aroian R. V., Sternberg P. W., 1990 The *let-60* locus controls the switch between  
727 vulval and nonvulval cell fates in *Caenorhabditis elegans*. *Genetics* 126: 899–913.
- 728 Han M., Sternberg P. W., 1991 Analysis of dominant-negative mutations of the  
729 *Caenorhabditis elegans let-60 ras* gene. *Genes Dev.* 5: 2188–2198.
- 730 Han M., Golden A., Han Y., Sternberg P. W., 1993 *C. elegans lin-45 raf* gene participates in  
731 *let-60 ras*-stimulated vulval differentiation. *Nature* 363: 133–140.

- 732 Hiley E., McMullan R., Nurrish S. J., 2006 The Galpha12-RGS RhoGEF-RhoA signalling  
733 pathway regulates neurotransmitter release in *C. elegans*. *EMBO J.* 25: 5884–5895.
- 734 Hirotsu T., Saeki S., Yamamoto M., Iino Y., 2000 The Ras-MAPK pathway is important for  
735 olfaction in *Caenorhabditis elegans*. *Nature* 404: 289–293.
- 736 Hirotsu T., Iino Y., 2005 Neural circuit-dependent odor adaptation in *C. elegans* is regulated  
737 by the Ras-MAPK pathway. *Genes Cells* 10: 517–530.
- 738 Honda Z., Takano T., Gotoh Y., Nishida E., Ito K., *et al.*, 1994 Transfected platelet-activating  
739 factor receptor activates mitogen-activated protein (MAP) kinase and MAP kinase  
740 kinase in Chinese hamster ovary cells. *J. Biol. Chem.* 269: 2307–2315.
- 741 Hsu V., Zobel C. L., Lambie E. J., Schedl T., Kornfeld K., 2002 *Caenorhabditis elegans* lin-45  
742 raf is essential for larval viability, fertility and the induction of vulval cell fates.  
743 *Genetics* 160: 481–492.
- 744 Hu Z., Vashlishan-Murray A. B., Kaplan J. M., 2015 NLP-12 engages different UNC-13  
745 proteins to potentiate tonic and evoked release. *J. Neurosci.* 35: 1038–1042.
- 746 Hunt-Newbury R., Viveiros R., Johnsen R., Mah A., Anastas D., *et al.*, 2007 High-throughput  
747 in vivo analysis of gene expression in *Caenorhabditis elegans*. *PLoS Biol.* 5: e237.
- 748 Hyde R., Corkins M. E., Somers G. A., Hart A. C., 2011 PKC-1 acts with the ERK MAPK  
749 signaling pathway to regulate *C. elegans* mechanosensory response. *Genes Brain*  
750 *Behav.* 10: 286–298.
- 751 Impey S., Obrietan K., Storm D. R., 1999 Making New Connections. *Neuron* 23: 11–14.

- 752 Jovanovic J. N., Czernik A. J., Fienberg A. A., Greengard P., Sihra T. S., 2000 Synapsins as  
753 mediators of BDNF-enhanced neurotransmitter release. *Nat. Neurosci.* 3: 323.
- 754 Karnoub A. E., Weinberg R. A., 2008 Ras oncogenes: split personalities. *Nat. Rev. Mol. Cell*  
755 *Biol.* 9: 517–531.
- 756 Kornfeld K., Guan K. L., Horvitz H. R., 1995a The *Caenorhabditis elegans* gene *mek-2* is  
757 required for vulval induction and encodes a protein similar to the protein kinase  
758 MEK. *Genes Dev.* 9: 756–768.
- 759 Kornfeld K., Hom D. B., Horvitz H. R., 1995b The *ksr-1* gene encodes a novel protein kinase  
760 involved in Ras-mediated signaling in *C. elegans*. *Cell* 83: 903–913.
- 761 Kushner S. A., Elgersma Y., Murphy G. G., Jaarsma D., Woerden G. M. van, *et al.*, 2005  
762 Modulation of presynaptic plasticity and learning by the H-ras/extracellular signal-  
763 regulated kinase/synapsin I signaling pathway. *J. Neurosci.* 25: 9721–9734.
- 764 Lackner M. R., Kim S. K., 1998 Genetic analysis of the *Caenorhabditis elegans* MAP kinase  
765 gene *mpk-1*. *Genetics* 150: 103–117.
- 766 Lackner M. R., Nurrish S. J., Kaplan J. M., 1999 Facilitation of Synaptic Transmission by EGL-  
767 30 Gq $\alpha$  and EGL-8 PLC $\beta$ : DAG Binding to UNC-13 Is Required to Stimulate  
768 Acetylcholine Release. *Neuron* 24: 335–346.
- 769 Lutz S., Freichel-Blomquist A., Yang Y., R umenapp U., Jakobs K. H., *et al.*, 2005 The guanine  
770 nucleotide exchange factor p63RhoGEF, a specific link between Gq/11-coupled  
771 receptor signaling and RhoA. *J. Biol. Chem.* 280: 11134–11139.

- 772 Lutz S., Shankaranarayanan A., Coco C., Ridilla M., Nance M. R., *et al.*, 2007 Structure of  
773 Galphaq-p63RhoGEF-RhoA complex reveals a pathway for the activation of RhoA by  
774 GPCRs. *Science* 318: 1923–1927.
- 775 Mahoney T. R., Luo S., Nonet M. L., 2006 Analysis of synaptic transmission in  
776 *Caenorhabditis elegans* using an aldicarb-sensitivity assay. *Nat. Protoc.* 1: 1772–  
777 1777.
- 778 Mao L.-M., Wang J. Q., 2016a Regulation of Group I Metabotropic Glutamate Receptors by  
779 MAPK/ERK in Neurons. *J. Nat. Sci.* 2: e268.
- 780 Mao L.-M., Wang J. Q., 2016b Synaptically Localized Mitogen-Activated Protein Kinases:  
781 Local Substrates and Regulation. *Mol. Neurobiol.* 53: 6309–6315.
- 782 Marais R., Light Y., Paterson H. F., Marshall C. J., 1995 Ras recruits Raf-1 to the plasma  
783 membrane for activation by tyrosine phosphorylation. *EMBO J.* 14: 3136–3145.
- 784 McMullan R., Hiley E., Morrison P., Nurrish S. J., 2006 Rho is a presynaptic activator of  
785 neurotransmitter release at pre-existing synapses in *C. elegans*. *Genes Dev.* 20: 65–  
786 76.
- 787 McMullan R., Anderson A., Nurrish S., 2012 Behavioral and Immune Responses to Infection  
788 Require Gαq- RhoA Signaling in *C. elegans*. *PLOS Pathog.* 8: e1002530.
- 789 Mello C. C., Kramer J. M., Stinchcomb D., Ambros V., 1991 Efficient gene transfer in  
790 *C.elegans*: extrachromosomal maintenance and integration of transforming  
791 sequences. *EMBO J.* 10: 3959–3970.

- 792 Miller K. G., Emerson M. D., Rand J. B., 1999 Gqalpha and diacylglycerol kinase negatively  
793 regulate the Gqalpha pathway in *C. elegans*. *Neuron* 24: 323–333.
- 794 Nguyen A., Burack W. R., Stock J. L., Kortum R., Chaika O. V., *et al.*, 2002 Kinase Suppressor  
795 of Ras (KSR) Is a Scaffold Which Facilitates Mitogen-Activated Protein Kinase  
796 Activation In Vivo. *Mol. Cell. Biol.* 22: 3035–3045.
- 797 Nicholas H. R., Hodgkin J., 2004 The ERK MAP kinase cascade mediates tail swelling and a  
798 protective response to rectal infection in *C. elegans*. *Curr. Biol.* 14: 1256–1261.
- 799 Ortiz J., Harris H. W., Guitart X., Terwilliger R. Z., Haycock J. W., *et al.*, 1995 Extracellular  
800 signal-regulated protein kinases (ERKs) and ERK kinase (MEK) in brain: regional  
801 distribution and regulation by chronic morphine. *J. Neurosci.* 15: 1285–1297.
- 802 Reiner D., Lundquist E. A., 2016 Small GTPases. *WormBook Online Rev. C Elegans Biol.*  
803 doi/10.1895/wormbook.1.67.2
- 804 Rhee S. G., 2001 Regulation of phosphoinositide-specific phospholipase C. *Annu. Rev.*  
805 *Biochem.* 70: 281–312.
- 806 Robbins D. J., Cheng M., Zhen E., Vanderbilt C. A., Feig L. A., *et al.*, 1992 Evidence for a Ras-  
807 dependent extracellular signal-regulated protein kinase (ERK) cascade. *Proc. Natl.*  
808 *Acad. Sci. U. S. A.* 89: 6924–6928.
- 809 Schmitz S. K., King C., Kortleven C., Huson V., Kroon T., *et al.*, 2016 Presynaptic inhibition  
810 upon CB1 or mGlu2/3 receptor activation requires ERK/MAPK phosphorylation of  
811 Munc18-1. *EMBO J.* 35: 1236–1250.

- 812 Schrader L. A., Birnbaum S. G., Nadin B. M., Ren Y., Bui D., *et al.*, 2006 ERK/MAPK regulates  
813 the Kv4.2 potassium channel by direct phosphorylation of the pore-forming subunit.  
814 *Am. J. Physiol. Cell Physiol.* 290: C852-861.
- 815 Sieburth D. S., Sundaram M., Howard R. M., Han M., 1999 A PP2A regulatory subunit  
816 positively regulates Ras-mediated signaling during *Caenorhabditis elegans* vulval  
817 induction. *Genes Dev.* 13: 2562–2569.
- 818 Stambouliau S., Choi J.-S., Ahn H.-S., Chang Y.-W., Tyrrell L., *et al.*, 2010 ERK1/2 mitogen-  
819 activated protein kinase phosphorylates sodium channel Na(v)1.7 and alters its  
820 gating properties. *J. Neurosci.* 30: 1637–1647.
- 821 Sternberg P. W., 2005 Vulval development. *WormBook Online Rev. C Elegans Biol.*  
822 [doi/10.1895/wormbook.1.6.1](https://doi.org/10.1895/wormbook.1.6.1)
- 823 Stokoe D., Macdonald S. G., Cadwallader K., Symons M., Hancock J. F., 1994 Activation of Raf  
824 as a result of recruitment to the plasma membrane. *Science* 264: 1463–1467.
- 825 Sun Y., Liu W.-Z., Liu T., Feng X., Yang N., *et al.*, 2015 Signaling pathway of MAPK/ERK in cell  
826 proliferation, differentiation, migration, senescence and apoptosis. *J. Recept. Signal*  
827 *Transduct. Res.* 35: 600–604.
- 828 Sundaram M., Han M., 1995 The *C. elegans* *ksr-1* gene encodes a novel Raf-related kinase  
829 involved in Ras-mediated signal transduction. *Cell* 83: 889–901.
- 830 Sundaram M. V., 2013 Canonical RTK-Ras-ERK signaling and related alternative pathways.  
831 *WormBook Online Rev. C Elegans Biol.* [doi/10.1895/wormbook.1.80.2](https://doi.org/10.1895/wormbook.1.80.2)



- 832 Sweatt J. D., 2004 Mitogen-activated protein kinases in synaptic plasticity and memory.  
833 Curr. Opin. Neurobiol. 14: 311–317.
- 834 Thomas G. M., Huganir R. L., 2004 MAPK cascade signalling and synaptic plasticity. Nat. Rev.  
835 Neurosci. 5: 173–183.
- 836 Tomida T., Oda S., Takekawa M., Iino Y., Saito H., 2012 The Temporal Pattern of Stimulation  
837 Determines the Extent and Duration of MAPK Activation in a Caenorhabditis elegans  
838 Sensory Neuron. Sci Signal 5: ra76.
- 839 Tomioka M., Adachi T., Suzuki H., Kunitomo H., Schafer W. R., *et al.*, 2006 The insulin/PI 3-  
840 kinase pathway regulates salt chemotaxis learning in Caenorhabditis elegans.  
841 Neuron 51: 613–625.
- 842 Topalidou I., Chen P.-A., Cooper K., Watanabe S., Jorgensen E. M., *et al.*, 2017a The NCA-1  
843 and NCA-2 Ion Channels Function Downstream of Gq and Rho To Regulate  
844 Locomotion in Caenorhabditis elegans. Genetics 206: 265-282.
- 845 Topalidou I., Cooper K., Pereira L., Ailion M., 2017b Dopamine negatively modulates the  
846 NCA ion channels in C. elegans. PLoS Genet. 13: e1007032.
- 847 Ueda Y., Hirai S. i, Osada S. i, Suzuki A., Mizuno K., *et al.*, 1996 Protein kinase C activates the  
848 MEK-ERK pathway in a manner independent of Ras and dependent on Raf. J. Biol.  
849 Chem. 271: 23512–23519.

- 850 Uozumi T., Hirotsu T., Yoshida K., Yamada R., Suzuki A., *et al.*, 2012 Temporally-regulated  
851 quick activation and inactivation of Ras is important for olfactory behaviour. *Sci.*  
852 *Rep.* 2: 500.
- 853 van Biesen T., Hawes B. E., Raymond J. R., Luttrell L. M., Koch W. J., *et al.*, 1996 G(o)-protein  
854 alpha-subunits activate mitogen-activated protein kinase via a novel protein kinase  
855 C-dependent mechanism. *J. Biol. Chem.* 271: 1266–1269.
- 856 Vara H., Onofri F., Benfenati F., Sassoè-Pognetto M., Giustetto M., 2009 ERK activation in  
857 axonal varicosities modulates presynaptic plasticity in the CA3 region of the  
858 hippocampus through synapsin I. *Proc. Natl. Acad. Sci. U. S. A.* 106: 9872–9877.
- 859 Wilkie T. M., Scherle P. A., Strathmann M. P., Slepak V. Z., Simon M. I., 1991 Characterization  
860 of G-protein alpha subunits in the Gq class: expression in murine tissues and in  
861 stromal and hematopoietic cell lines. *Proc. Natl. Acad. Sci. U. S. A.* 88: 10049–10053.
- 862 Williams S. L., Lutz S., Charlie N. K., Vettel C., Ailion M., *et al.*, 2007 Trio's Rho-specific GEF  
863 domain is the missing Gαq effector in *C. elegans*. *Genes Dev.* 21: 2731–2746.
- 864 Wu Y., Han M., Guan K. L., 1995 MEK-2, a *Caenorhabditis elegans* MAP kinase kinase,  
865 functions in Ras-mediated vulval induction and other developmental events. *Genes*  
866 *Dev.* 9: 742–755.
- 867 Yang F., Sun W., Yang Y., Wang Y., Li C.-L., *et al.*, 2015 SDF1–CXCR4 signaling contributes to  
868 persistent pain and hypersensitivity via regulating excitability of primary

- 869 nociceptive neurons: involvement of ERK-dependent Nav1.8 up-regulation. J.  
870 Neuroinflammation 12: 219–233.
- 871 Yoder J. H., Chong H., Guan K.-L., Han M., 2004 Modulation of KSR activity in *Caenorhabditis*  
872 *elegans* by Zn ions, PAR-1 kinase and PP2A phosphatase. EMBO J. 23: 111–119.
- 873 Yoon S., Seger R., 2006 The extracellular signal-regulated kinase: multiple substrates  
874 regulate diverse cellular functions. Growth Factors 24: 21–44.
- 875 You Y., Kim J., Cobb M., Avery L., 2006 Starvation activates MAP kinase through the  
876 muscarinic acetylcholine pathway in *Caenorhabditis elegans* pharynx. Cell Metab. 3:  
877 237–245.
- 878 Zhang H., Koo C. Y., Stebbing J., Giamas G., 2013 The dual function of KSR1: a pseudokinase  
879 and beyond. Biochem. Soc. Trans. 41: 1078–1082.
- 880
- 881
- 882

**Figure 1**

**A**

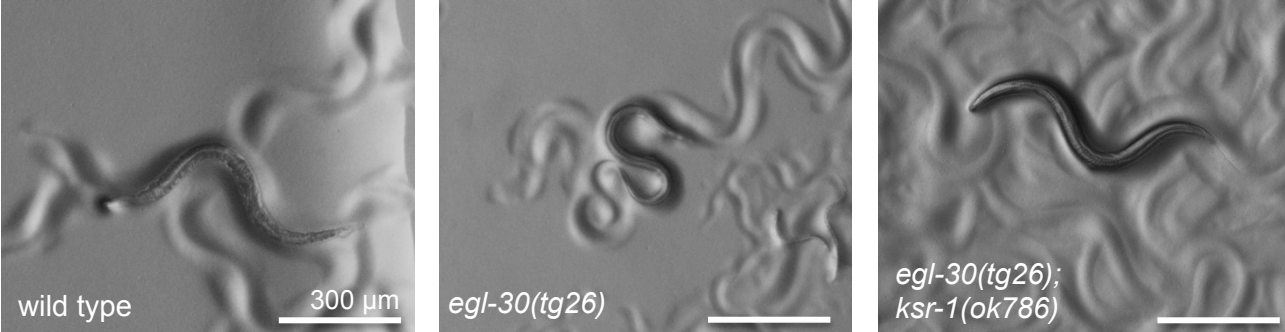

**B**

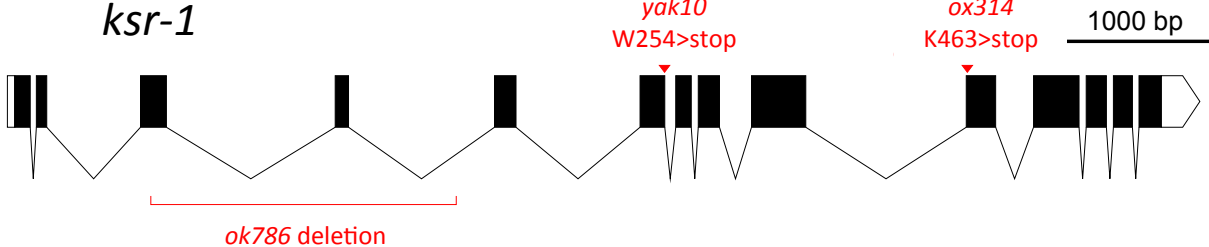

**C**

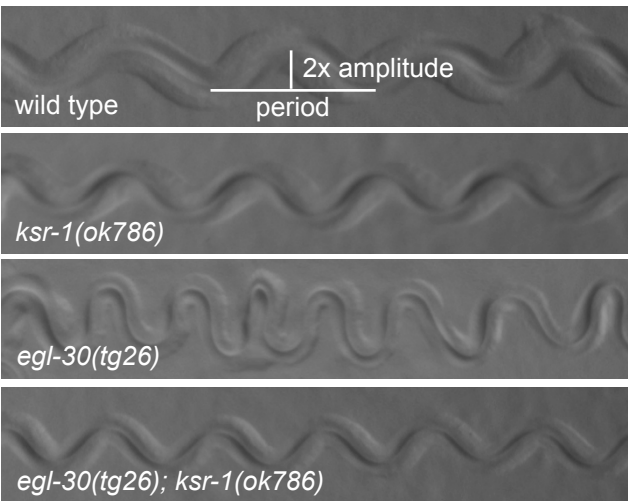

**D**

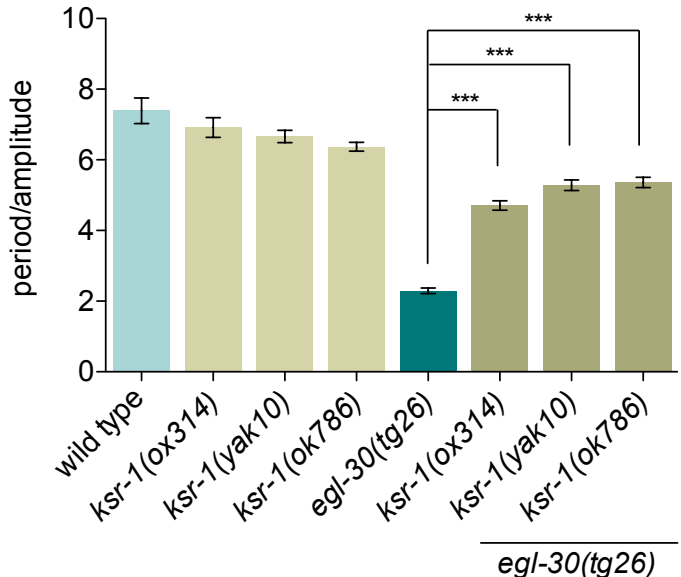

# Figure 2

**A**

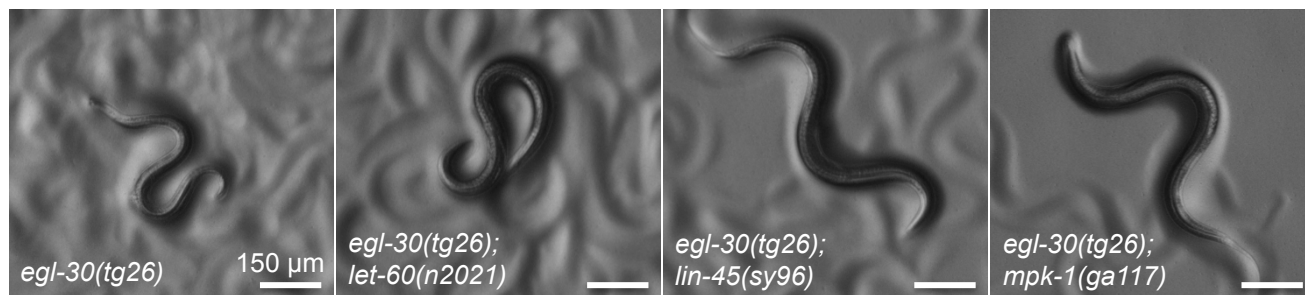

**B**

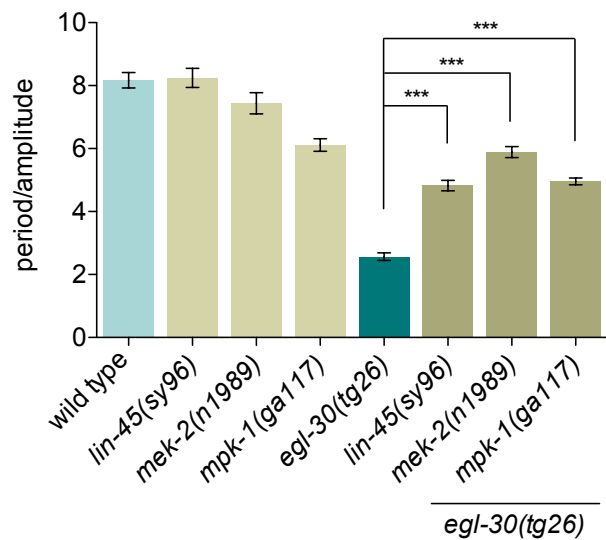

**C**

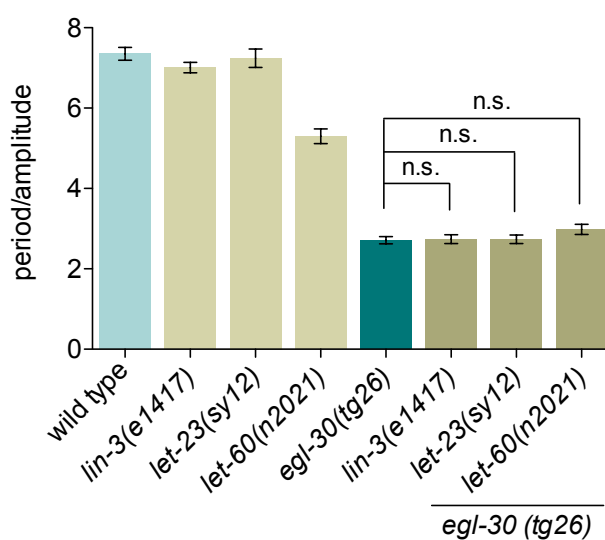

**D**

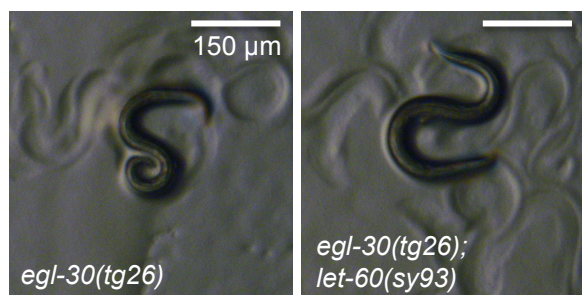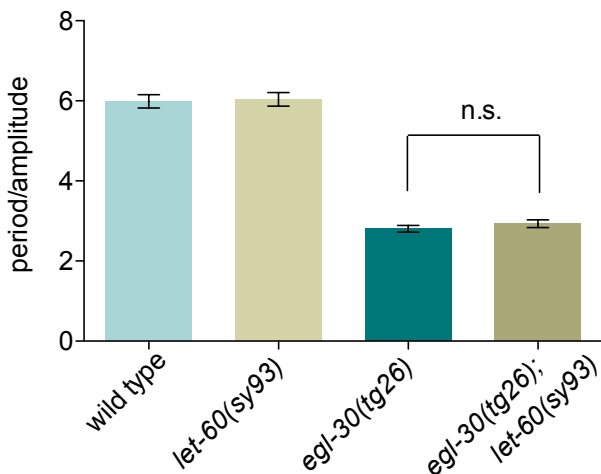

# Figure 3

**A**

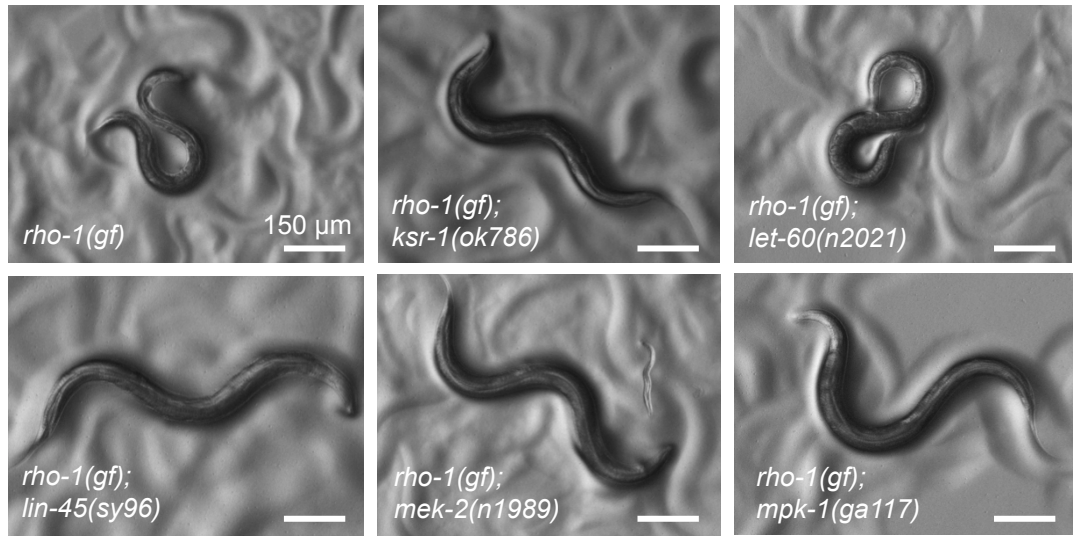

**B**

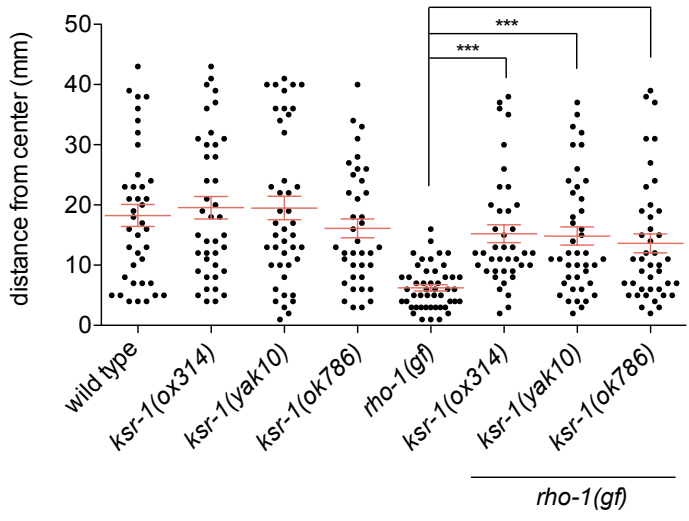

**C**

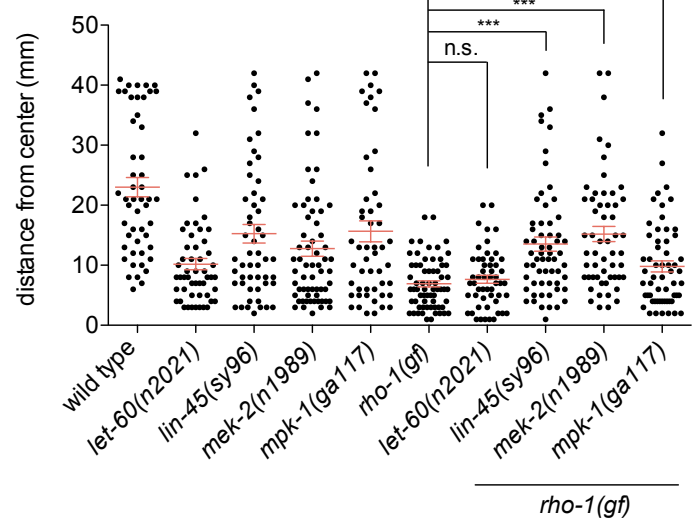

**Figure 4**

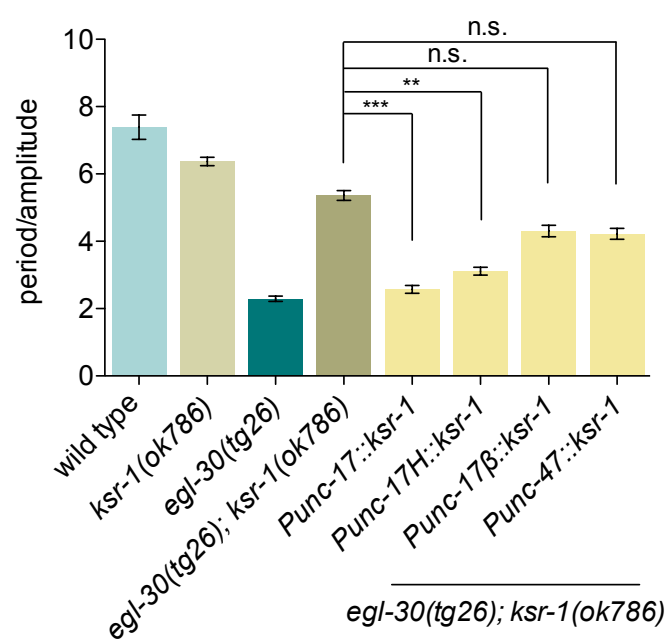

**Figure 5****A**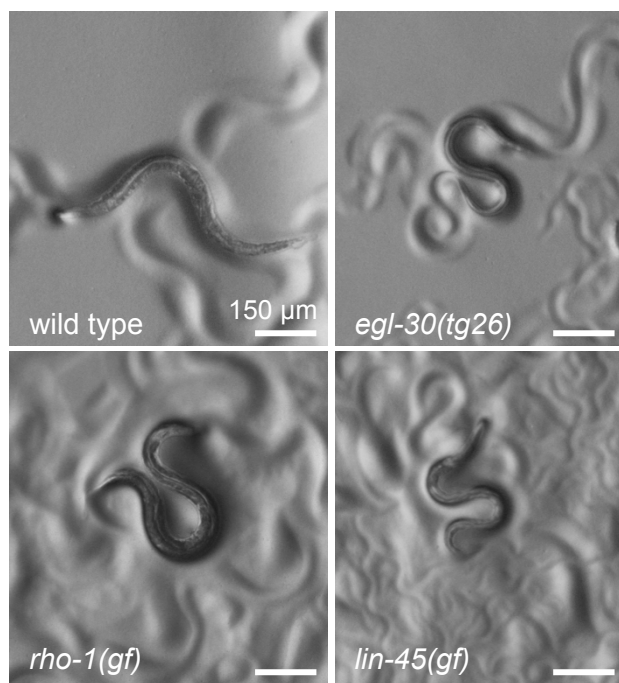**B**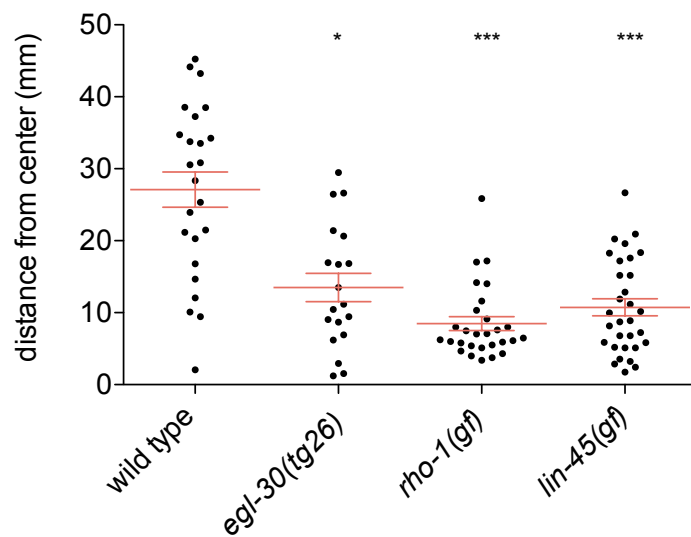**C**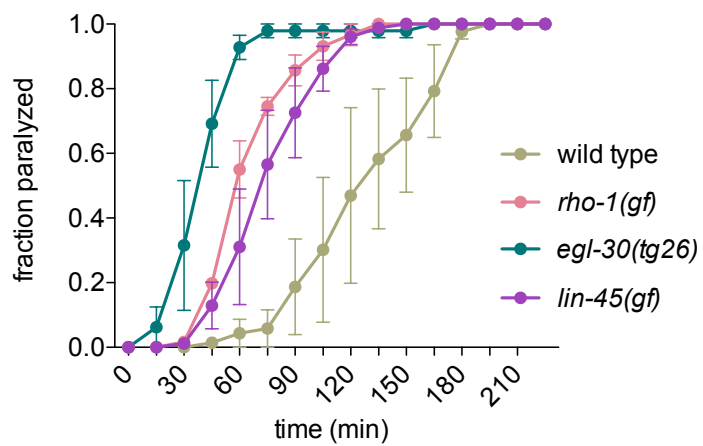**D**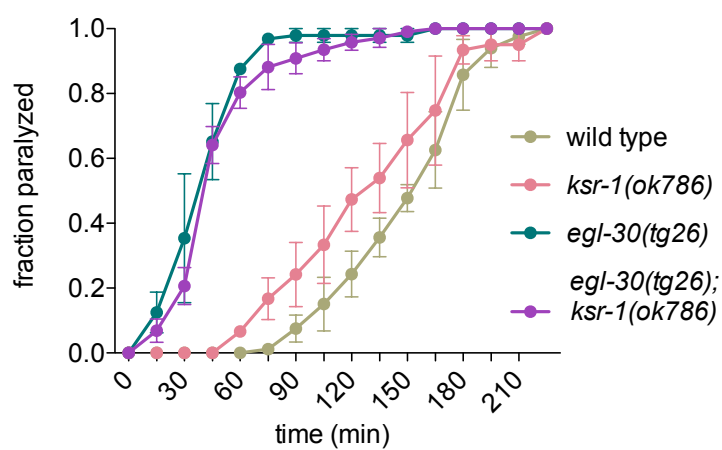



**Figure 6**

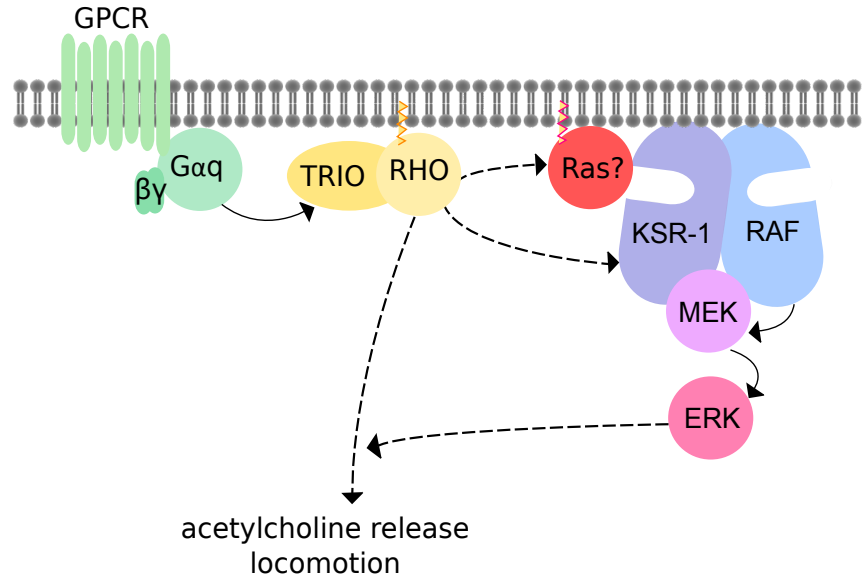

**Figure S1**

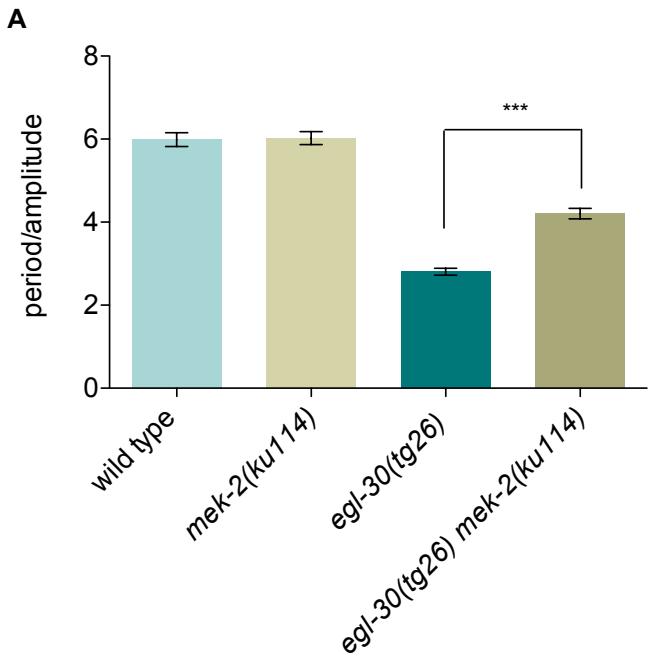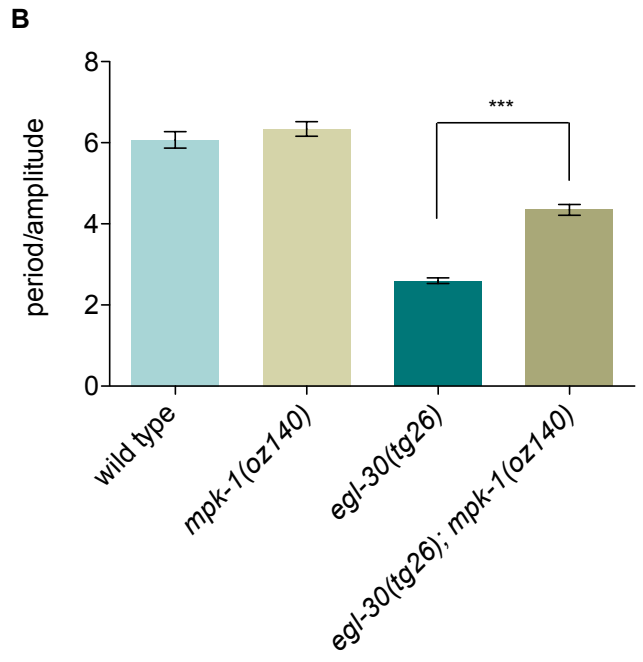

**Figure S2**

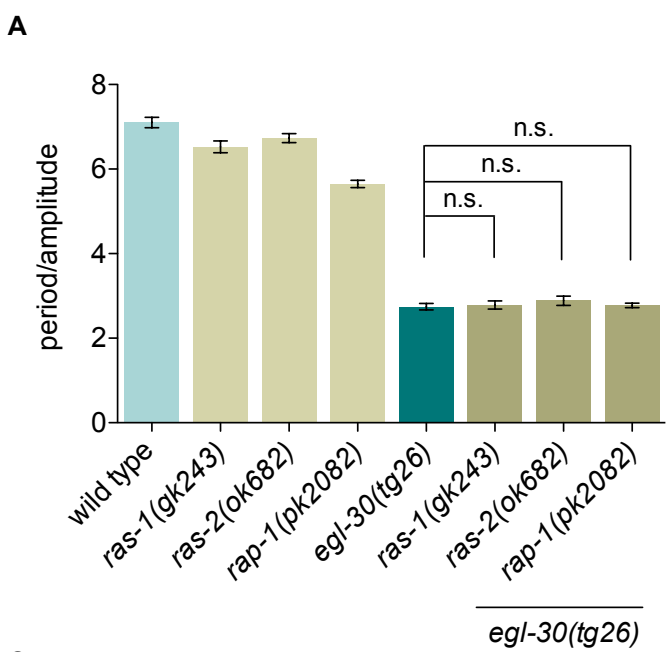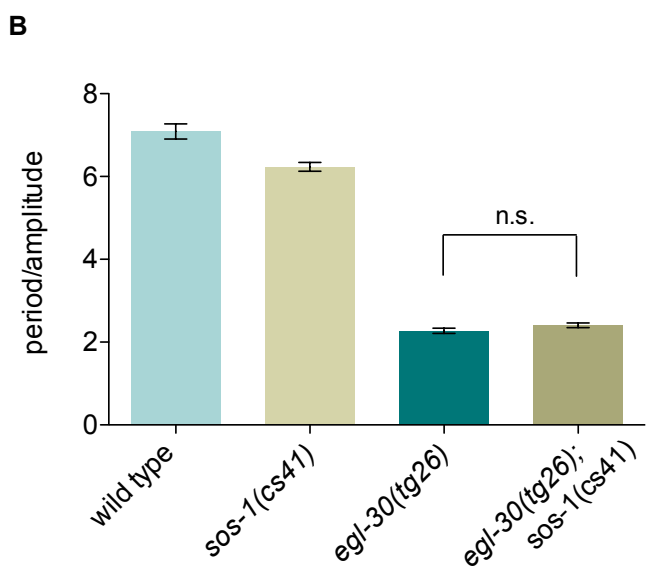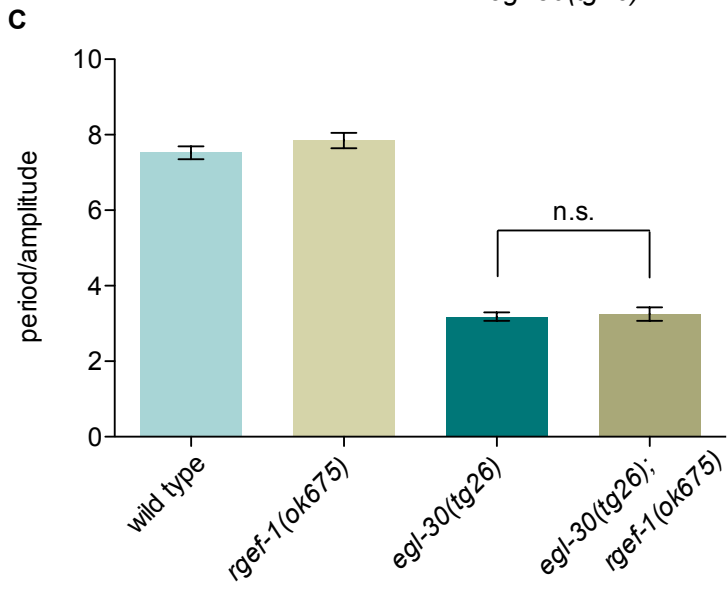

**Figure S3**

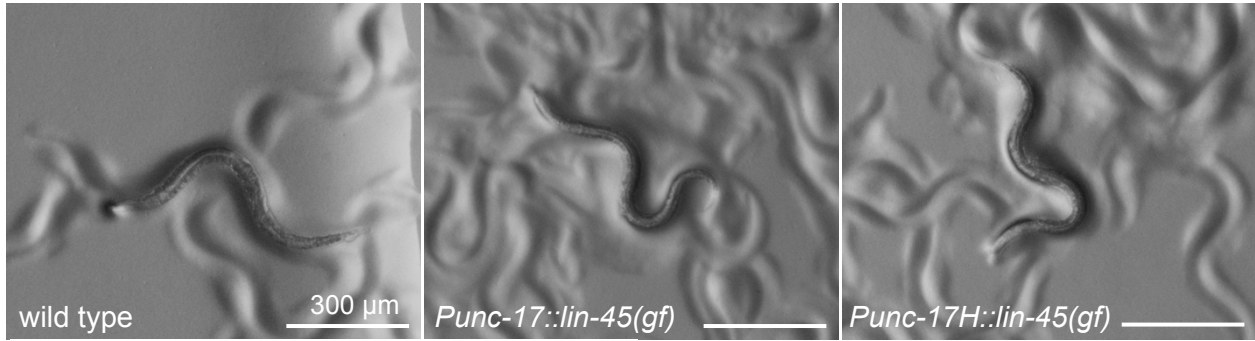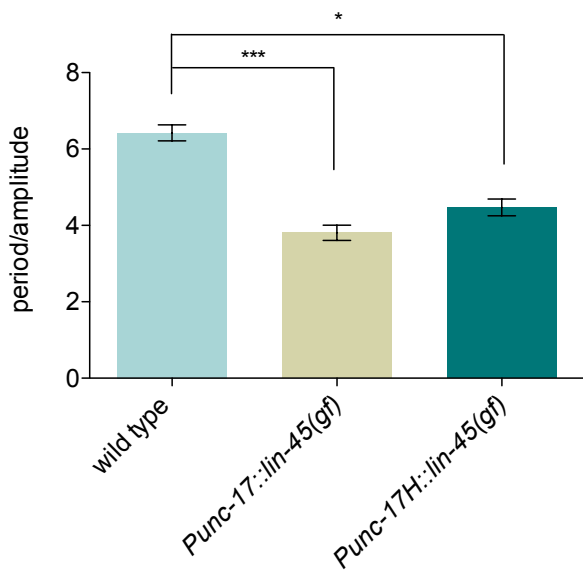

Source: http://biorxiv.org/content/10.1101/231746v1.full.pdf
